# Supplementary material
Source: Research Square preprint supplement (doi:10.21203/rs.3.rs-9241041/v1)
Supplement: Supplementary file 1 [file 5749ee22a3d18ec09faca699.docx]

**
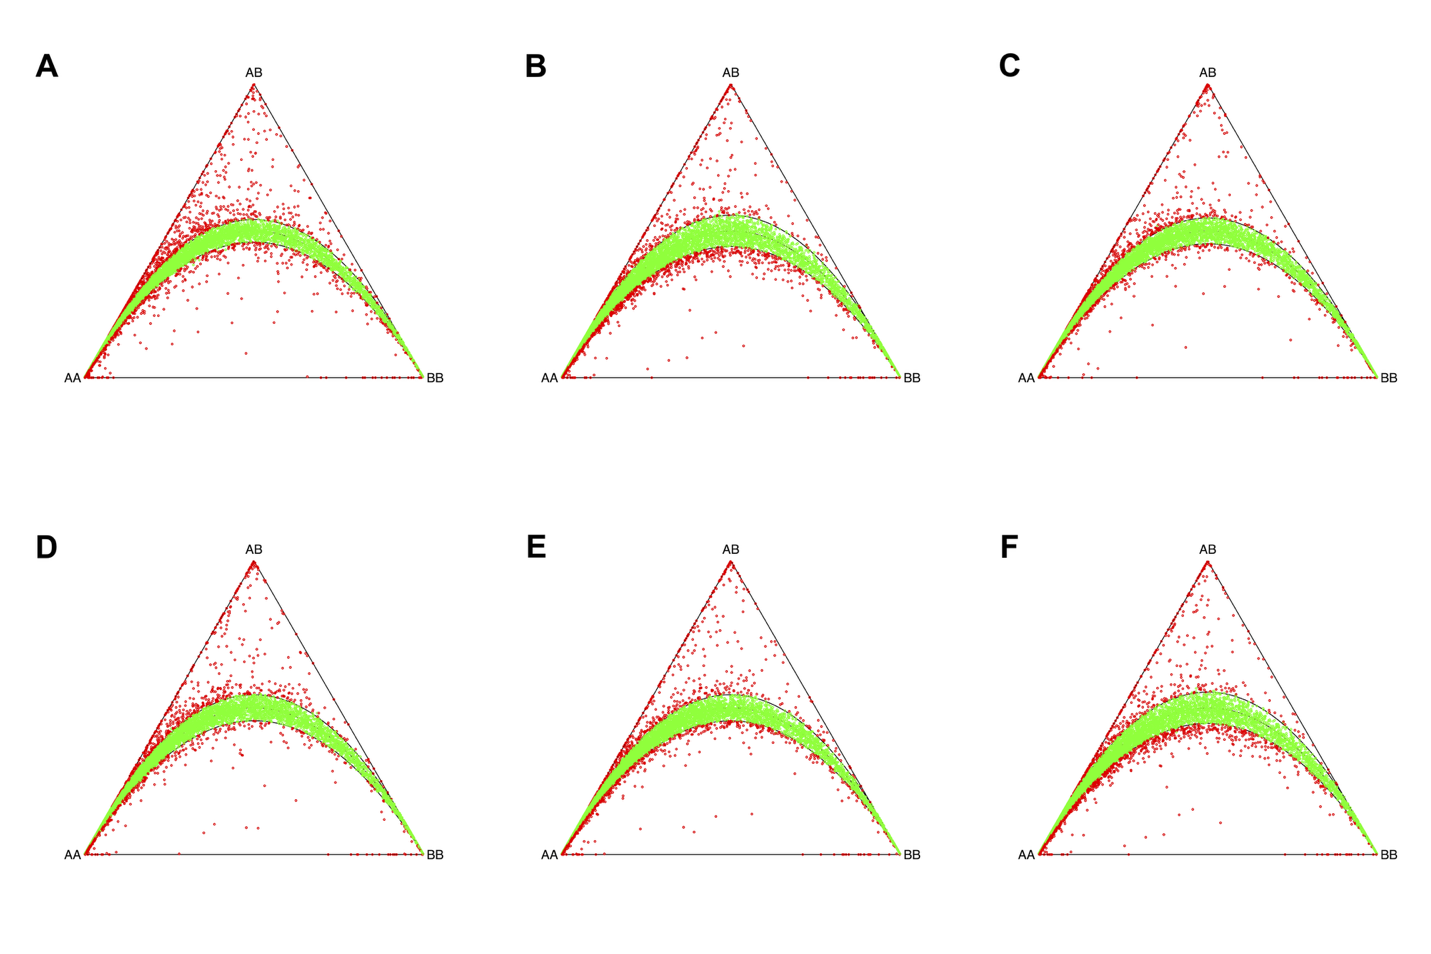
Supplementary Figure 1. Hardy–Weinberg equilibrium (HWE) statistics were calculated for all biallelic structural variants on the autosomes.** Deviations from HWE were tested using a chi-square goodness-of-fit approach with one degree of freedom. Genotype labels are indicated as follows: 0/0 for homozygous reference, 0/1 for heterozygous, and 1/1 for homozygous alternate. Each site is colored according to its chi-square P value. **A.** AFR, **B.** AMR, **C.** EAS, **D.** EUR, **E.** SAS, and **F.** NCBN

**
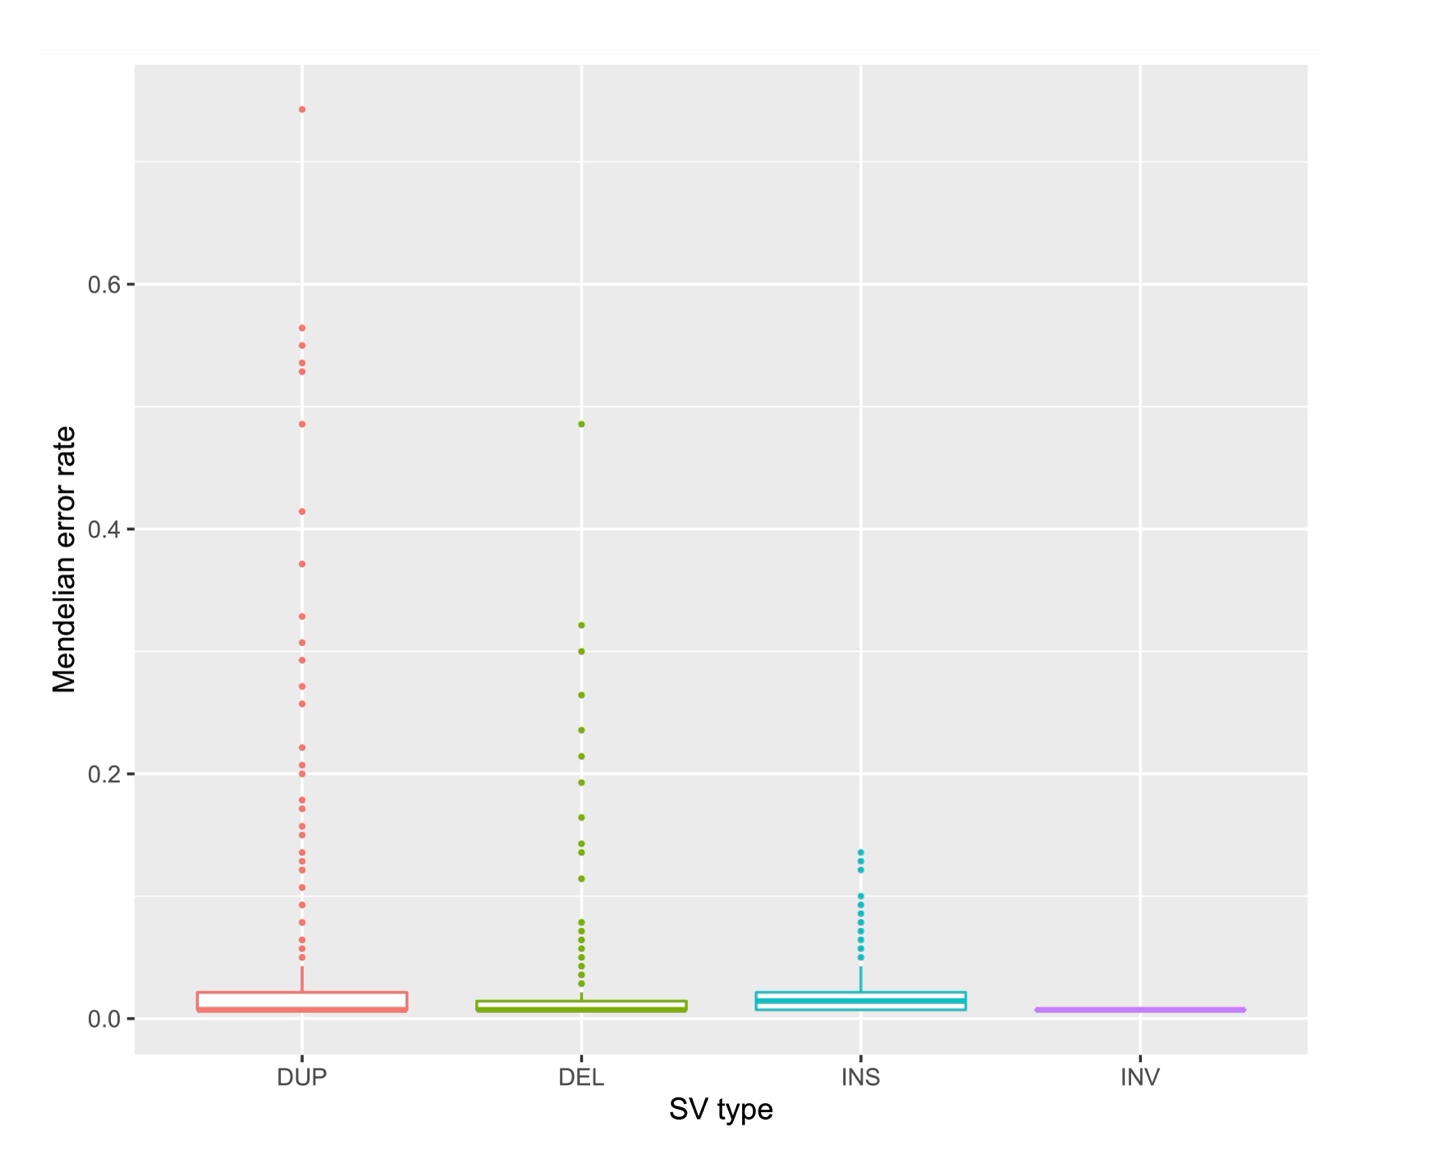
Supplementary Figure 2. Trio analysis was conducted for 142 trios available in our study.** The Mendelian error rate for each SV type is shown in this figure.

**
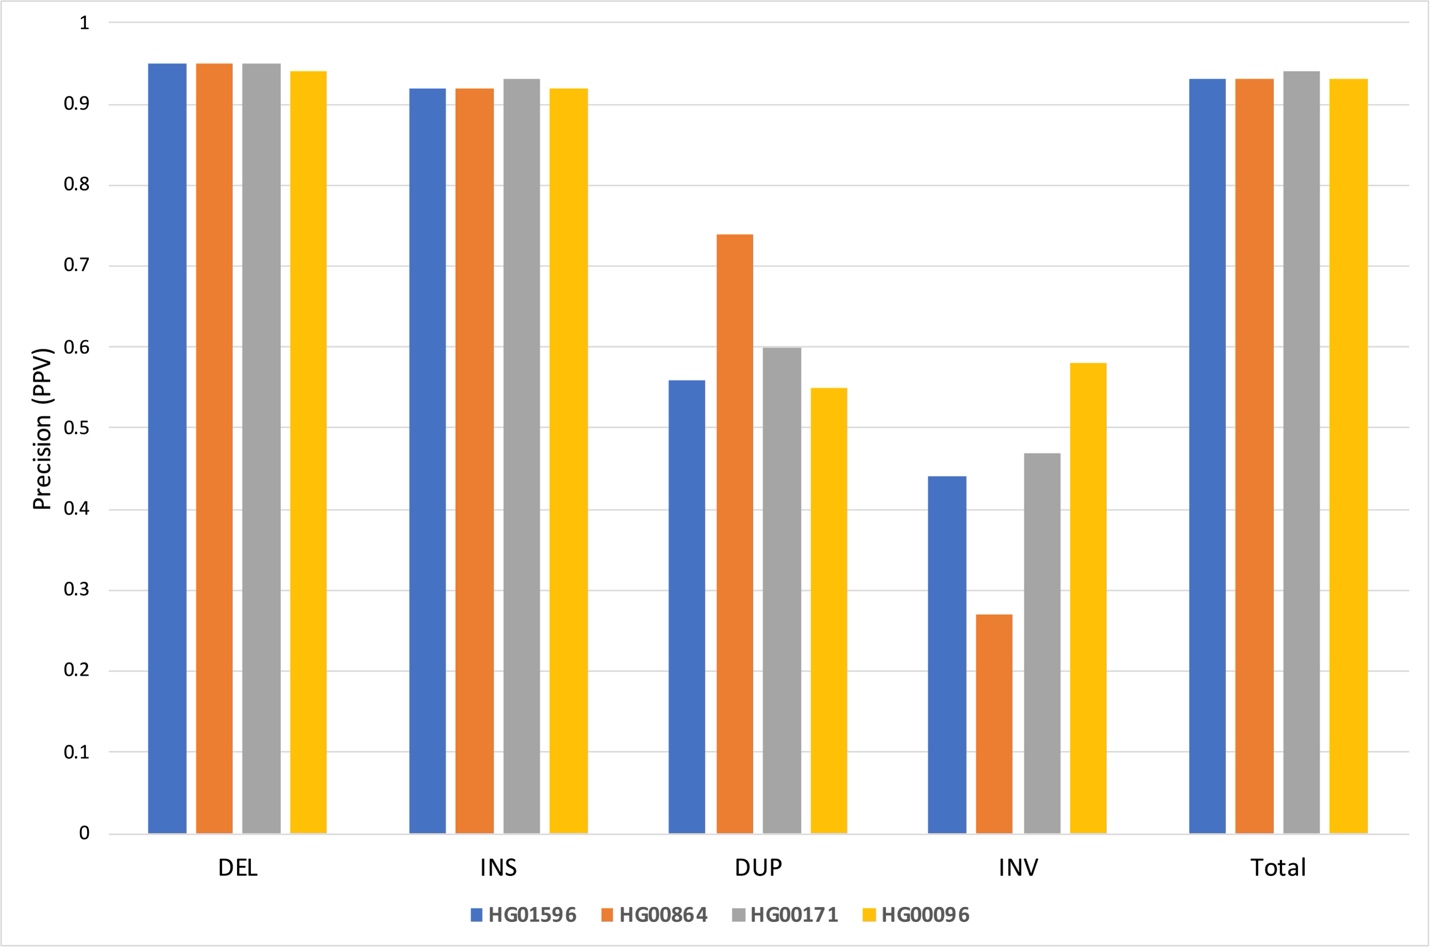
Supplementary Figure 3. Evaluation of positive predictive value for different SV types as well as all SV types (Total) using TT-MARS.**


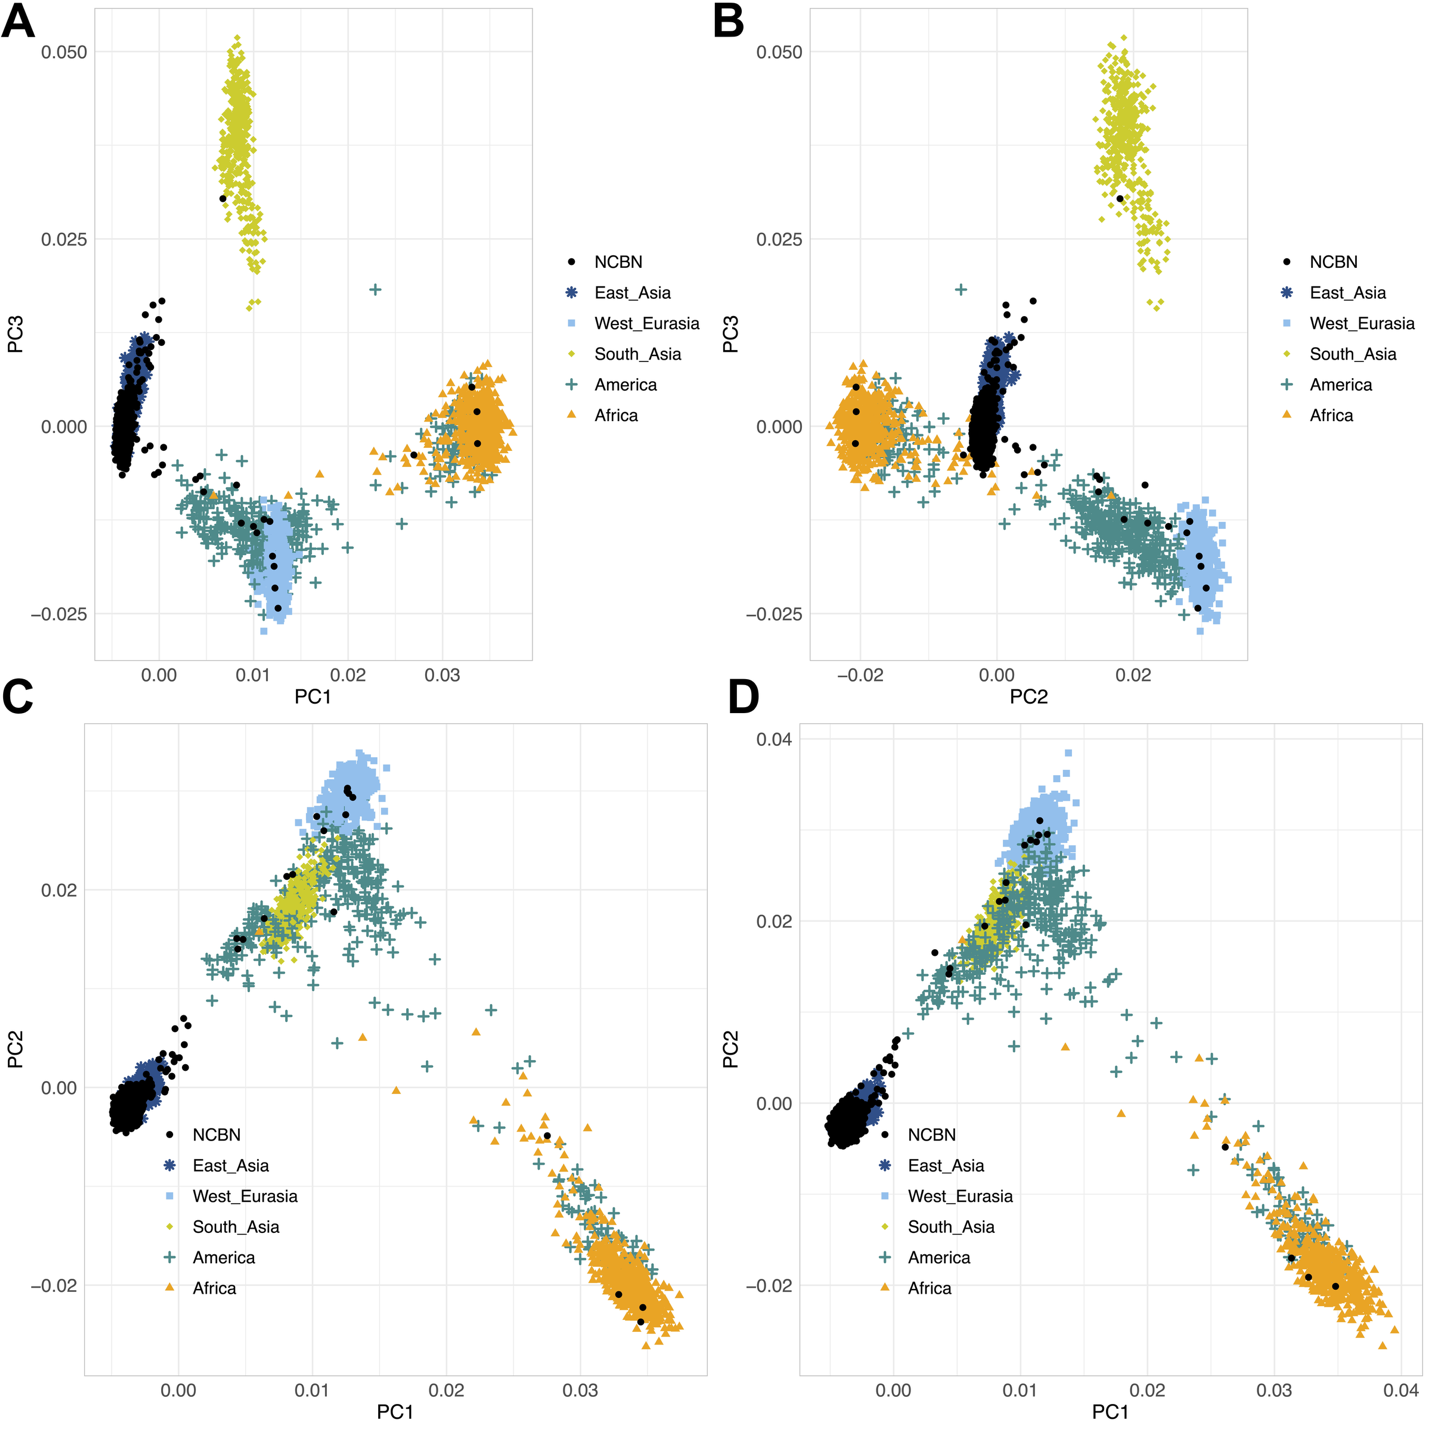


**Supplementary Figure 4. Principal Component Analysis (PCA).** The figure shows the segregation of population groups using PC1 and PC3 (**A**) as well as PC2 and PC3 (**B**). Panels **C** and **D** show the continental clustering based on PCA of either deletions or insertions, respectively.


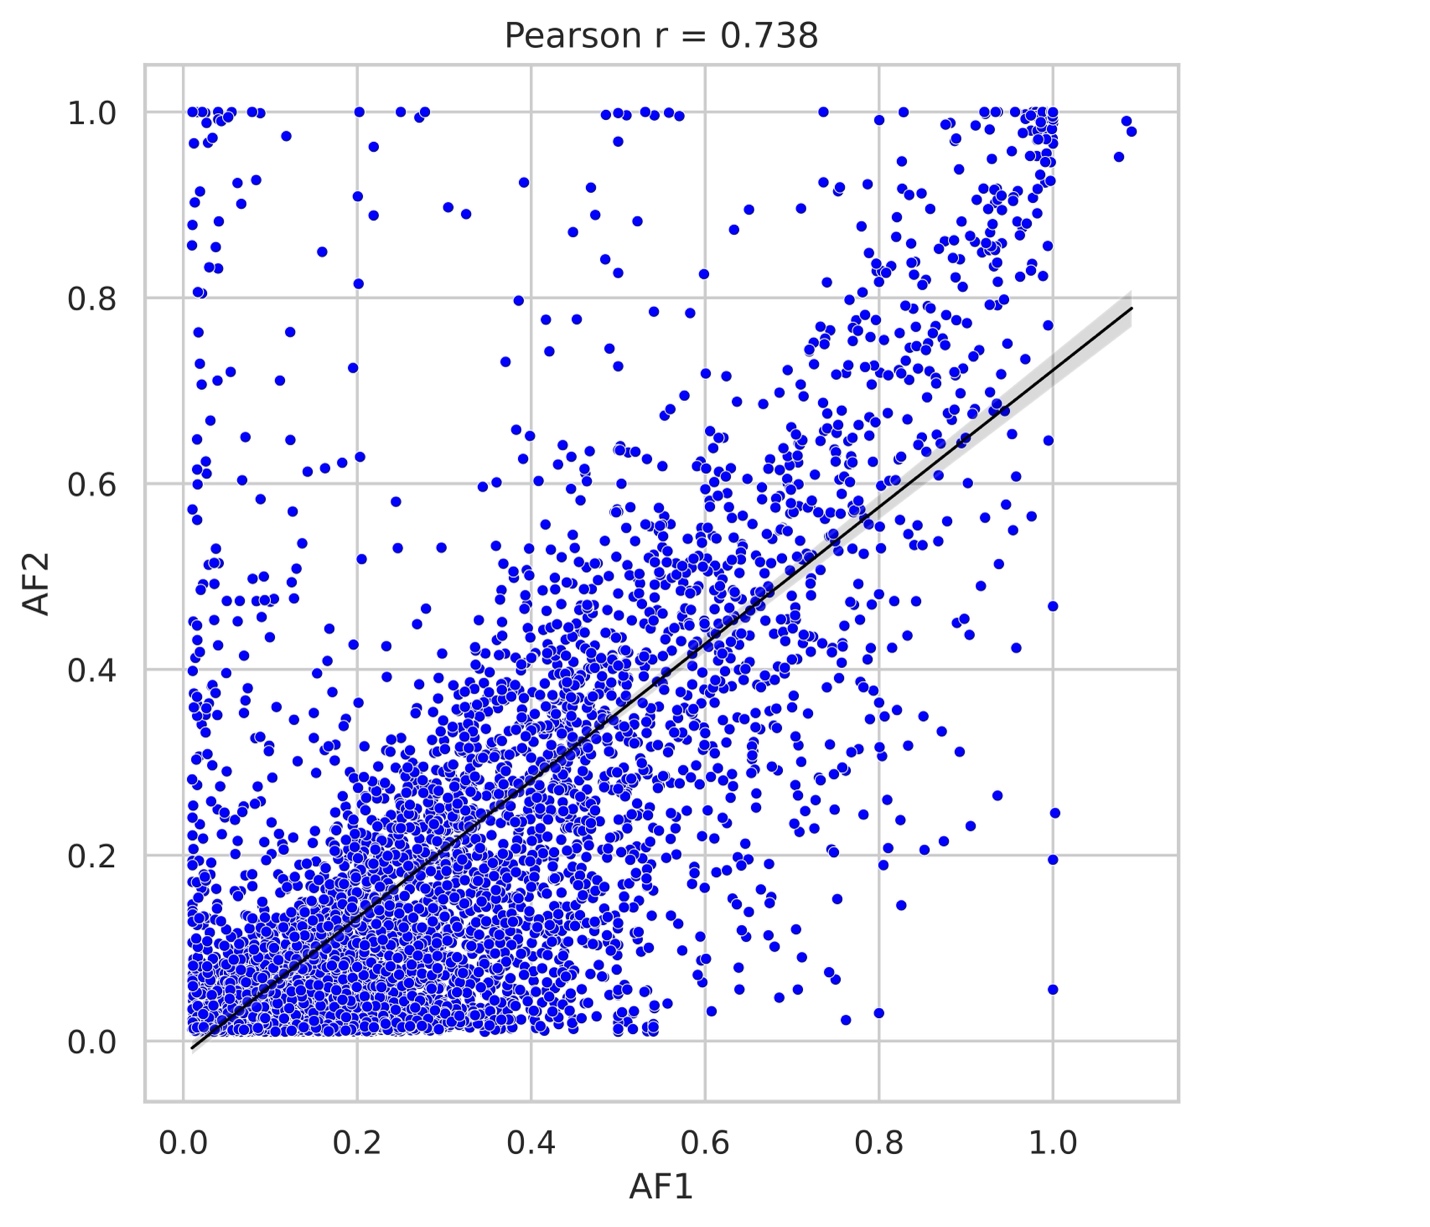


**Supplementary Figure 5. The correlation coefficient of the allele frequency of SVs detected in our study (AF1) and the gnomAD study (AF2).** The Pearson correlation coefficient between reported allele frequencies was 0.738.
