# Supplementary material
Source: Research Square preprint supplement (doi:10.21203/rs.3.rs-9241041/v1)
Supplement: Supplementary file 2 [file feda9be8d44222770070cc52.xlsx]

## Sheet: Supplementary Table 1
Supplementary Table 1. Quality control procedures before and after calling the structural variants.
		NCBN samples (M:F)	1KG samples	Total
Initial number of samples		9,850 (4,826M:5,025F)	2504 (1,233M:1,271F)	12354
Saliva as DNA source		390	0	390
Inconsistency of gender between clinical and genomic data; DNA contamination; low call rate		19	0	19
Non-uniform genome-wide coverage		19	3	22
Chromosome aneuploidy		16	23	39
Extremely large CNVs		1	2	3
Abnormal insert size distribution		0	0	0
SV call count outliers	MANTA	1	4	33
	DELLY	13	11
		2 (DELLY;MANTA; LUMPY) 1 (LUMPY; MANTA) 1 (DELLY;MANTA)
	LUMPY	0	0
Final number of samples		9387	2461	11848

## Sheet: Supplementary Table 2
Supplementary Table 2. List of SVs with high LD (r2>0.8) with previously reported GWAS lead SNPs.
No.	SV_ID	SV_TYPE	CHR	SNP_ID	Pubmed_ID:GWAS_Trait:GWAS_P-value
1	SV_chr1:1226336:DG	DEL	1	rs3766186	30072576:Blood protein levels:6E-11
2	SV_chr1:1227292:DG	DEL	1	rs3766186	30072576:Blood protein levels:6E-11
3	SV_chr1:1248054:DG	DEL	1	rs6603785	28714469:Systemic lupus erythematosus:9E-6
4	SV_chr1:1934923:DG	DEL	1	rs2803316	36376304:Body mass index (MTAG):1E-16
5	SV_chr1:1934923:DG	DEL	1	rs3121830	31669095:Body mass index:3E-14
6	SV_chr1:2960007:DG	DEL	1	rs11583804	34099189:Schizophrenia, bipolar disorder or recurrent major depressive disorder x sex interaction:7E-6
7	SV_chr1:6798592:DG	DEL	1	rs11122155	37164063:Corpus callosum fractional anisotropy (genu):4E-8
8	SV_chr1:6798592:DG	DEL	1	rs11122156	34910505:Vertex-wise cortical thickness:6E-9
9	SV_chr1:17349677:DG	DEL	1	rs2240335	32912934:IgA nephropathy:8E-8
10	SV_chr1:20537539:DG	DEL	1	rs113923880	34260948:Complement factor H-like 1 protein levels:8E-6
11	SV_chr1:24193857:DG	DEL	1	rs7552167	23143594:Psoriasis:9E-12
12	SV_chr1:27905878:FG	INS	1	rs2474470	32888493:White blood cell count:2E-20
13	SV_chr1:29825305:DG	DEL	1	rs993245	31882771:Ethylmalonate levels in elite athletes:6E-7
14	SV_chr1:36750194:FG	INS	1	rs488614	29942085:Neuroticism:2E-10
15	SV_chr1:36750194:FG	INS	1	rs569460	30867560:General factor of neuroticism:4E-10
16	SV_chr1:54626600:DG	DEL	1	rs11206397	29875488:Protein FAM151A levels (FAM151A.7856.51.3):3E-24
17	SV_chr1:54626600:DG	DEL	1	rs11206398	34648354:Protein FAM151A levels:2E-69
18	SV_chr1:60878383:FG	INS	1	rs11589487	29808027:Spherical equivalent or myopia (age of diagnosis):3E-11
19	SV_chr1:60878383:FG	INS	1	rs876214	32352494:Spherical equivalent:1E-8
20	SV_chr1:62123776:DG	DEL	1	rs2012694	28115739:Methadone dose in opioid dependence:7E-6
21	SV_chr1:67542276:DG	DEL	1	rs4415537	35710981:Estimated glomerular filtration rate (creatinine):1E-15
22	SV_chr1:72290009:DG	DEL	1	rs61765651	35835914:Insomnia:9E-29
23	SV_chr1:72300640:DG	DEL	1	rs11209948	37280435:Childhood body mass index:2E-24
24	SV_chr1:72300640:DG	DEL	1	rs1460943	36376304:Body mass index (MTAG):2E-55
25	SV_chr1:72300640:DG	DEL	1	rs2568956	32066663:Oily fish consumption:2E-8
26	SV_chr1:72300640:DG	DEL	1	rs2568958	36581621:Body mass index:3E-88
27	SV_chr1:72300640:DG	DEL	1	rs2568960	35835914:Insomnia:8E-14
28	SV_chr1:72300640:DG	DEL	1	rs2568961	36750733:Depression (broad):4E-8
29	SV_chr1:72300640:DG	DEL	1	rs2815752	20935630:Body mass index:2E-22
30	SV_chr1:72300640:DG	DEL	1	rs2815753	37277458:Multi-trait sex score:4E-11
31	SV_chr1:73303100:DG	DEL	1	rs12023347	31906708:Anxiety:9E-9
32	SV_chr1:73303100:DG	DEL	1	rs12129573	29700475:Depression:4E-12
33	SV_chr1:73303100:DG	DEL	1	rs58693447	36477530:Smoking initiation:2E-72
34	SV_chr1:78061615:DG	DEL	1	rs2031496	30038396:Educational attainment (MTAG):6E-12
35	SV_chr1:84246322:DG	DEL	1	rs12088543	38116116:Platelet count:2E-8
36	SV_chr1:86344334:TG	INV	1	rs574651214	35224516:COVID-19 (severe vs population):7E-6
37	SV_chr1:89010225:DG	DEL	1	rs17433780	26343869:Carotid intima media thickness:2E-6
38	SV_chr1:95336286:FG	INS	1	rs4950045	36581621:Body mass index:2E-9
39	SV_chr1:96402048:FG	INS	1	rs77272293	35835914:Insomnia:1E-9
40	SV_chr1:108190708:DG	DEL	1	rs12118280	27863252:Myeloid white cell count:4E-10
41	SV_chr1:109053483:DG	DEL	1	rs34680256	37106081:LDL (standard GWA):4E-8
42	SV_chr1:116535542:DG	DEL	1	rs1016140	33536424:Systemic lupus erythematosus:3E-10
43	SV_chr1:116535542:DG	DEL	1	rs6677309	24076602:Multiple sclerosis:5E-42
44	SV_chr1:153161230:DG	DEL	1	rs509061	32119686:Adverse response to inhaled corticosteroid treatment x age interaction in asthma:2E-7
45	SV_chr1:158080923:DG	DEL	1	rs11802995	29808027:Spherical equivalent or myopia (age of diagnosis):6E-10
46	SV_chr1:160985050:DG	DEL	1	rs2990701	34282934:Vaginal microbiome MetaCyc pathway (POLYAMINSYN3-PWY|superpathway of polyamine biosynthesis II):6E-6
47	SV_chr1:160985050:DG	DEL	1	rs3007156	34282934:Vaginal microbiome MetaCyc pathway (POLYAMINSYN3-PWY|superpathway of polyamine biosynthesis II):6E-6
48	SV_chr1:165761972:DG	DEL	1	rs4657476	29617998:Intraocular pressure:4E-45
49	SV_chr1:165761972:DG	DEL	1	rs7528177	37386247:Primary open angle glaucoma (multi-trait analysis):6E-143
50	SV_chr1:171936868:FG	INS	1	rs1998174	27863252:Platelet distribution width:4E-9
51	SV_chr1:180888413:FG	INS	1	rs1043069	38689001:Pulse pressure:3E-9
52	SV_chr1:180888413:FG	INS	1	rs12143674	35762941:Pulse pressure:3E-9
53	SV_chr1:188217317:FG	INS	1	rs12734405	31484785:Longevity:3E-7
54	SV_chr1:204269327:FG	INS	1	rs10793760	32888494:Platelet count:2E-10
55	SV_chr1:209904710:DG	DEL	1	rs12140373	36581621:Body mass index:2E-14
56	SV_chr1:219401335:FG	INS	1	rs12128945	34021172:Hip circumference adjusted for BMI:2E-14
57	SV_chr1:219411126:DG	DEL	1	rs2265978	31669095:Waist circumference adjusted for body mass index:4E-8
58	SV_chr1:221795813:FG	INS	1	rs4846724	35361970:Educational attainment:3E-13
59	SV_chr1:221860801:DG	DEL	1	rs12144971	36224396:Height:4E-10
60	SV_chr1:233206359:FG	INS	1	rs12027542	21490949:Type 2 diabetes:4E-7
61	SV_chr1:236420806:DG	DEL	1	rs77896710	34343768:Total protein levels x insomnia interaction:2E-8
62	SV_chr1:247405670:FG	INS	1	rs61838753	32888494:Neutrophil count:1E-13
63	SV_chr1:247405670:FG	INS	1	rs61838754	36376304:C-reactive protein levels (MTAG):1E-10
64	SV_chr1:247406228:DG	DEL	1	rs61838753	32888494:Neutrophil count:1E-13
65	SV_chr1:247406228:DG	DEL	1	rs61838754	36376304:C-reactive protein levels (MTAG):1E-10
66	SV_chr2:554635:FG	INS	2	rs13411762	36581621:Body mass index:4E-31
67	SV_chr2:652657:FG	INS	2	rs13396935	30643258:Smoking status (ever vs never smokers):4E-13
68	SV_chr2:652657:FG	INS	2	rs13412194	31453325:Waist circumference:1E-55
69	SV_chr2:652657:FG	INS	2	rs35913461	30297969:Type 2 diabetes:2E-11
70	SV_chr2:18104448:FG	INS	2	rs6729954	36653534:Free testosterone levels:1E-8
71	SV_chr2:26851335:FG	INS	2	rs13029206	36918541:Spatial QRS-T angle:2E-15
72	SV_chr2:28438798:DG	DEL	2	rs11676985	36376304:Triglyceride levels (MTAG):8E-9
73	SV_chr2:36249541:FG	INS	2	rs34765784	32844198:Residual cognitive resilience:2E-6
74	SV_chr2:44410220:FG	INS	2	rs1067394	31886626:Anxiety disorder (factor score):8E-10
75	SV_chr2:54338356:DG	DEL	2	rs10196726	36224396:Height:1E-10
76	SV_chr2:55856391:DG	DEL	2	rs4352264	34382107:Inguinal hernia:2E-25
77	SV_chr2:66431859:FG	INS	2	rs6546232	32888493:Monocyte count:2E-10
78	SV_chr2:66431859:FG	INS	2	rs756292	34594039:White blood cell count:5E-12
79	SV_chr2:69897912:DG	DEL	2	rs6716937	31757997:Breast cancer:4E-7
80	SV_chr2:73203803:DG	DEL	2	rs13415504	35050183:N-delta-acetylornithine levels:3E-28
81	SV_chr2:79198777:FG	INS	2	rs17016534	23823483:Metabolite levels:5E-6
82	SV_chr2:99487251:DG	DEL	2	rs6761390	30038396:Highest math class taken:2E-11
83	SV_chr2:114773319:DG	DEL	2	rs319858	30571770:Stress sensitivity (neuroticism score x major depressive disorder status interaction):4E-6
84	SV_chr2:146105051:DG	DEL	2	rs62169487	33830181:High myopia:1E-6
85	SV_chr2:146105051:DG	DEL	2	rs62169493	30595370:Lung function (FEV1/FVC):2E-12
86	SV_chr2:147719437:FG	INS	2	rs7584099	20339536:Response to statin therapy:5E-7
87	SV_chr2:151184690:DG	DEL	2	rs34276187	30038396:Highest math class taken (MTAG):2E-8
88	SV_chr2:151184690:DG	DEL	2	rs6705511	30038396:Self-reported math ability (MTAG):3E-10
89	SV_chr2:162809898:DG	DEL	2	rs7601793	36477530:Drinks per week:2E-10
90	SV_chr2:165766661:FG	INS	2	rs13422985	34594039:Gamma glutamyl transpeptidase:2E-13
91	SV_chr2:169248605:DG	DEL	2	rs16823029	34272381:Estimated glomerular filtration rate (cystatin c):5E-12
92	SV_chr2:171048630:FG	INS	2	rs2676131	36224396:Height:5E-238
93	SV_chr2:174225897:DG	DEL	2	rs6707192	36477530:Smoking initiation:8E-18
94	SV_chr2:176400913:DG	DEL	2	rs10198459	31578528:Urate levels:3E-9
95	SV_chr2:176508944:TG	INV	2	rs59156997	27182965:Chin dimples:2E-19
96	SV_chr2:197898724:FG	INS	2	rs6735214	32916098:Electrocardiogram morphology (amplitude at temporal datapoints):7E-11
97	SV_chr2:200330213:FG	INS	2	rs295114	29892015:Atrial fibrillation:4E-17
98	SV_chr2:202334672:FG	INS	2	rs112753638	30595370:Menarche (age at onset):4E-13
99	SV_chr2:203034348:DG	DEL	2	rs115654617	29212778:Coronary artery disease:2E-32
100	SV_chr2:203034348:DG	DEL	2	rs145538381	31430377:Non-lobar intracerebral hemorrhage (MTAG):2E-7
101	SV_chr2:214336907:FG	INS	2	rs10932534	26634245:Post bronchodilator FEV1/FVC ratio in COPD:5E-6
102	SV_chr2:218333970:FG	INS	2	rs68020776	34021172:Hip circumference adjusted for BMI:3E-8
103	SV_chr2:219067056:DG	DEL	2	rs1052483	18391951:Height:1E-6
104	SV_chr2:219187601:DG	DEL	2	rs11680709	36477530:Smoking initiation:1E-9
105	SV_chr2:219187601:DG	DEL	2	rs7580095	32888494:Monocyte count:2E-11
106	SV_chr2:231426184:DG	DEL	2	rs12614599	32929287:CD45 on CD33- HLA DR-:2E-12
107	SV_chr2:231426184:DG	DEL	2	rs4973397	25387707:Anti-saccade response:6E-8
108	SV_chr2:231426184:DG	DEL	2	rs6721978	32929287:CD45 on Natural Killer:1E-15
109	SV_chr2:231715726:FG	INS	2	rs55729107	32888494:White blood cell count:2E-18
110	SV_chr2:234899128:DG	DEL	2	rs6431308	27797806:Essential tremor:2E-7
111	SV_chr2:238717525:DG	DEL	2	rs74001718	30595370:Lung function (FEV1/FVC):2E-8
112	SV_chr2:240413240:FG	INS	2	rs1316369	36376304:Body mass index (MTAG):3E-8
113	SV_chr3:21193422:FG	INS	3	rs112062413	36395887:RBC levels of Pyruvate (uM):1E-10
114	SV_chr3:24261126:FG	INS	3	rs113967141	34887591:High density lipoprotein cholesterol levels:4E-15
115	SV_chr3:29714174:FG	INS	3	rs9809942	36224396:Height:4E-10
116	SV_chr3:31000013:FG	INS	3	rs1506203	23568457:Eating disorders (purging via substances):8E-6
117	SV_chr3:48400315:DG	DEL	3	rs7651407	34272381:Estimated glomerular filtration rate (creatinine):2E-13
118	SV_chr3:49160316:DG	DEL	3	rs4499638	29500382:Irritable mood:2E-9
119	SV_chr3:49160316:DG	DEL	3	rs6790914	33393726:Behcet's disease:3E-7
120	SV_chr3:52696930:FG	INS	3	rs2164885	35974141:Verbal learning:2E-7
121	SV_chr3:52696930:FG	INS	3	rs2289247	35974141:Verbal learning:2E-7
122	SV_chr3:52696930:FG	INS	3	rs3733041	35974141:Verbal learning:2E-7
123	SV_chr3:52696930:FG	INS	3	rs6976	35974141:Verbal learning:3E-8
124	SV_chr3:59867163:FG	INS	3	rs606735	35835914:Insomnia:4E-8
125	SV_chr3:61818824:DG	DEL	3	rs615854	31311600:Non-alcoholic fatty liver disease activity score in non-alcoholic fatty liver disease:2E-6
126	SV_chr3:64444391:FG	INS	3	rs62247449	35361970:Educational attainment:2E-19
127	SV_chr3:64444391:FG	INS	3	rs6803651	36477530:Smoking cessation:1E-9
128	SV_chr3:65609984:FG	INS	3	rs4450738	36224396:Height:6E-11
129	SV_chr3:73013926:DG	DEL	3	rs13078603	35361970:Educational attainment:1E-12
130	SV_chr3:114646077:FG	INS	3	rs16823078	36224396:Height:2E-30
131	SV_chr3:114646077:FG	INS	3	rs9841504	31383772:Gastric cancer:4E-6
132	SV_chr3:115305388:DG	DEL	3	rs201874554	36653534:Sex hormone-binding globulin levels:5E-9
133	SV_chr3:120706613:FG	INS	3	rs13077101	23251661:Obesity-related traits:1E-6
134	SV_chr3:131776234:DG	DEL	3	rs9853154	38538606:Body mass index:2E-16
135	SV_chr3:133784922:DG	DEL	3	rs9871148	25555482:Nicotine dependence symptom count:2E-6
136	SV_chr3:137353519:DG	DEL	3	rs13079202	36808568:Headache or HOMA-IR:2E-8
137	SV_chr3:137353519:DG	DEL	3	rs6780666	29326435:Intelligence (MTAG):5E-9
138	SV_chr3:145170662:DG	DEL	3	rs62273411	36210801:RS-6-hydroxywarfarin levels:1E-5
139	SV_chr3:149245583:DG	DEL	3	rs79742482	36764567:Histidine levels (UKB data field 23463):2E-18
140	SV_chr3:162794345:DG	DEL	3	rs206274	35585065:F-healthy food liking (derived food-liking factor):4E-8
141	SV_chr3:177195443:FG	INS	3	rs12493005	37430141:ICD10 L50: Urticaria:3E-12
142	SV_chr3:182581206:FG	INS	3	rs1463442	35386118:Cognitive performance (attention) (longitudinal):2E-6
143	SV_chr3:184159027:DG	DEL	3	rs1969253	22472876:Major depressive disorder:5E-6
144	SV_chr3:184159027:DG	DEL	3	rs843370	32888494:Mean corpuscular volume:1E-12
145	SV_chr3:184367935:DG	DEL	3	rs28550009	34469753:Platelet count:9E-35
146	SV_chr3:184367935:DG	DEL	3	rs9849502	32888493:Platelet count:9E-15
147	SV_chr4:1319647:FG	INS	4	rs28660352	26148204:Tenofovir clearance in HIV infection:7E-6
148	SV_chr4:1601229:DG	DEL	4	rs56039511	34021172:Hip circumference adjusted for BMI:8E-9
149	SV_chr4:7752960:FG	INS	4	rs6855176	29452408:Glaucoma (primary open-angle):7E-6
150	SV_chr4:19055848:DG	DEL	4	rs16898036	35361970:Educational attainment:2E-9
151	SV_chr4:19055848:DG	DEL	4	rs16898037	30038396:Educational attainment (MTAG):4E-9
152	SV_chr4:28419968:DG	DEL	4	rs59119104	36477530:Smoking initiation:1E-36
153	SV_chr4:39029456:DG	DEL	4	rs2254075	34594039:Monocyte count:3E-24
154	SV_chr4:72553037:DG	DEL	4	rs13105983	36474045:Coronary artery disease:7E-6
155	SV_chr4:74765074:FG	INS	4	rs59882675	29903748:Childhood steroid-sensitive nephrotic syndrome:6E-8
156	SV_chr4:79284574:DG	DEL	4	rs2867610	34924174:Depression:1E-8
157	SV_chr4:79284574:DG	DEL	4	rs6816922	30696823:Chronotype:4E-8
158	SV_chr4:85781574:FG	INS	4	rs76221875	38200428:Renal cell carcinoma:2E-7
159	SV_chr4:87110985:DG	DEL	4	rs442177	38448586:Triglyceride levels in HDL:5E-19
160	SV_chr4:88171507:FG	INS	4	rs10011796	36281732:Gout:1E-19
161	SV_chr4:88171507:FG	INS	4	rs11732936	36635386:4-hydroxychlorothalonil levels:7E-47
162	SV_chr4:88171507:FG	INS	4	rs2725271	25676789:Serum uric acid levels in response to allopurinol in gout:1E-7
163	SV_chr4:102864368:FG	INS	4	rs223337	36808568:Migraine or glucose levels:5E-9
164	SV_chr4:105313730:DG	DEL	4	rs2647261	29326435:Intelligence (MTAG):1E-10
165	SV_chr4:130773683:DG	DEL	4	rs3113500	30845926:Airway obstruction (FEV1/FVC<70%) in never smokers:3E-6
166	SV_chr4:145998426:DG	DEL	4	rs9762091	34910505:Vertex-wise sulcal depth:3E-12
167	SV_chr4:156526814:FG	INS	4	rs1402788	36006120:Ethion levels:1E-5
168	SV_chr4:179431991:FG	INS	4	rs1378552	25628336:Motion sickness:4E-9
169	SV_chr4:182114272:DG	DEL	4	rs35446926	32231278:Refractive error:2E-11
170	SV_chr4:183857249:DG	DEL	4	rs892837	30895295:Iris color (b* coordinate):7E-6
171	SV_chr5:654822:DG	DEL	5	rs4957082	36914875:Lung function (FEV1):3E-14
172	SV_chr5:1276654:DG	DEL	5	rs56345976	35803233:Uterine leiomyoma or breast cancer (pleiotropy):2E-11
173	SV_chr5:19466247:DG	DEL	5	rs425903	30348214:DNA methylation variation (age effect):3E-8
174	SV_chr5:36792502:FG	INS	5	rs34920909	34594039:Weight:2E-12
175	SV_chr5:42719833:FG	INS	5	rs6184	36224396:Height:1E-64
176	SV_chr5:51489836:FG	INS	5	rs56767241	34620984:Vertigo:1E-7
177	SV_chr5:56574954:DG	DEL	5	rs112307723	28552196:Waist-hip ratio:9E-6
178	SV_chr5:56808549:FG	INS	5	rs10461617	23209189:Type 2 diabetes:4E-6
179	SV_chr5:58027649:DG	DEL	5	rs6450460	35361970:Educational attainment:6E-14
180	SV_chr5:58027649:DG	DEL	5	rs6861883	34594039:Neutrophil count:2E-8
181	SV_chr5:60705877:DG	DEL	5	rs10939862	35668104:Alkenylphosphatidylethanolamine (P-20:0/18:2) levels:1E-26
182	SV_chr5:73775881:DG	DEL	5	rs11957938	35661827:Hearing loss:2E-27
183	SV_chr5:77457768:FG	INS	5	rs60296960	35383335:Total brain volume change rate:4E-7
184	SV_chr5:80261369:DG	DEL	5	rs56850090	30595370:Height:2E-8
185	SV_chr5:88103994:FG	INS	5	rs2217250	29500382:Feeling tense:1E-8
186	SV_chr5:88372602:DG	DEL	5	rs10514299	27479909:Major depressive disorder:1E-15
187	SV_chr5:88736195:DG	DEL	5	rs412458	31484785:Parental longevity (mother's age at death):8E-6
188	SV_chr5:96516062:FG	INS	5	rs2611732	34594039:Weight:1E-21
189	SV_chr5:96516062:FG	INS	5	rs261967	38116116:Weight:8E-11
190	SV_chr5:96989313:DG	DEL	5	rs38033	30072576:Blood protein levels:4E-721
191	SV_chr5:109715291:FG	INS	5	rs12657204	34648354:Coagulation factor XIII levels:8E-15
192	SV_chr5:115057966:DG	DEL	5	rs147202915	30578418:Systolic blood pressure:1E-13
193	SV_chr5:115057966:DG	DEL	5	rs6894014	35762941:Systolic blood pressure:3E-15
194	SV_chr5:117214474:FG	INS	5	rs6870246	31666681:White matter microstructure (fractional anisotropy):6E-9
195	SV_chr5:123388013:DG	DEL	5	rs17150407	35762941:Diastolic blood pressure:1E-19
196	SV_chr5:125381652:DG	DEL	5	rs1444658	35396580:Schizophrenia:5E-6
197	SV_chr5:127836638:DG	DEL	5	rs245201	19023125:Brain imaging in schizophrenia (dorsolateral prefrontal cortex interaction):9E-8
198	SV_chr5:131041277:FG	INS	5	rs12522464	37277458:Multi-trait sex score:2E-8
199	SV_chr5:131041277:FG	INS	5	rs1363695	36581621:Body mass index:2E-10
200	SV_chr5:142537962:FG	INS	5	rs249767	29760442:Central corneal thickness:5E-9
201	SV_chr5:143555801:DG	DEL	5	rs1037100	31882771:Indolin-2-one levels in elite athletes:4E-6
202	SV_chr5:143555801:DG	DEL	5	rs7712869	36224396:Height:1E-12
203	SV_chr5:150823598:DG	DEL	5	rs13361189	17554261:Crohn's disease:2E-10
204	SV_chr5:158440304:FG	INS	5	rs7446877	29912962:Diastolic blood pressure x alcohol consumption interaction (2df test):1E-19
205	SV_chr6:2384273:FG	INS	6	rs4959652	33288918:Facial morphology (segment 7):2E-12
206	SV_chr6:6277107:DG	DEL	6	rs4960182	33713768:Asthma (childhood onset):1E-6
207	SV_chr6:8227690:DG	DEL	6	rs13217044	27647854:Chronic kidney disease (chronic kidney disease vs normal or mildly reduced eGFR) in type 1 diabetes:4E-6
208	SV_chr6:8227690:DG	DEL	6	rs6597304	31882771:1-oleoyl-GPE (18:1) levels in elite athletes:4E-6
209	SV_chr6:8227690:DG	DEL	6	rs6929568	23870195:Coronary artery calcification:3E-6
210	SV_chr6:9014583:DG	DEL	6	rs430329	30573740:Male-pattern baldness:3E-44
211	SV_chr6:13521019:FG	INS	6	rs2841528	34594039:Lymphocyte count:3E-10
212	SV_chr6:14745054:DG	DEL	6	rs9476648	31882771:1,3,7-trimethylurate levels in elite athletes:4E-6
213	SV_chr6:18401856:DG	DEL	6	rs2296198	36764567:Citrate levels (UKB data field 23473):5E-13
214	SV_chr6:25529642:DG	DEL	6	rs214053	37596262:Platelet side fluorescence distribution width:8E-19
215	SV_chr6:25529642:DG	DEL	6	rs214056	38064665:Mean platelet volume at delivery:2E-19
216	SV_chr6:25529642:DG	DEL	6	rs214057	36224396:Height:3E-105
217	SV_chr6:25529642:DG	DEL	6	rs214058	32888494:Platelet distribution width:3E-57
218	SV_chr6:25529642:DG	DEL	6	rs6913974	37596262:High fluorescence immature platelet fraction:5E-60
219	SV_chr6:27715735:FG	INS	6	rs9380010	30643256:Positive affect:4E-15
220	SV_chr6:27715735:FG	INS	6	rs9380012	33859377:Anxiety:5E-30
221	SV_chr6:27715735:FG	INS	6	rs9468199	38155330:Parkinson's disease:9E-13
222	SV_chr6:31498593:FG	INS	6	rs41293864	28928442:Strep throat:2E-8
223	SV_chr6:31498593:FG	INS	6	rs41293876	37794016:Atopic dermatitis:4E-32
224	SV_chr6:32696463:FG	INS	6	rs35900855	33591409:Immunoglobulin A vasculitis:1E-8
225	SV_chr6:32827726:DG	DEL	6	rs241453	32492067:Protein quantitative trait loci:2E-6
226	SV_chr6:34074475:DG	DEL	6	rs76210789	34282934:Vaginal microbiome MetaCyc pathway (PWY-5838|superpathway of menaquinol-8 biosynthesis I):6E-6
227	SV_chr6:35658655:DG	DEL	6	rs9368881	36224396:Height:2E-21
228	SV_chr6:43067812:DG	DEL	6	rs4714661	36224396:Height:3E-14
229	SV_chr6:65885143:DG	DEL	6	rs9885896	32959083:Endometriosis or depression (pleiotropy):4E-9
230	SV_chr6:73795114:FG	INS	6	rs6903575	29875488:CD109 antigen levels (CD109.3290.50.2):7E-69
231	SV_chr6:76036787:DG	DEL	6	rs947340	36848389:Photoreceptor cell layer thickness phenotypes (MTAG):1E-13
232	SV_chr6:76556736:DG	DEL	6	rs4235898	23648065:Adverse response to chemotherapy (neutropenia/leucopenia) (all antimicrotubule drugs):1E-6
233	SV_chr6:77012791:FG	INS	6	rs4388256	36224396:Height:2E-34
234	SV_chr6:87941590:DG	DEL	6	rs2509458	17903302:Blood pressure:7E-6
235	SV_chr6:93834776:DG	DEL	6	rs12529374	34910505:Vertex-wise cortical thickness:3E-8
236	SV_chr6:93834776:DG	DEL	6	rs9452464	35835914:Insomnia:3E-9
237	SV_chr6:105951263:FG	INS	6	rs10457139	34648354:Regenerating islet-derived protein 3-alpha levels:1E-13
238	SV_chr6:116429650:DG	DEL	6	rs508521	36224396:Height:6E-6
239	SV_chr6:119096338:DG	DEL	6	rs6569038	28654678:Epstein-Barr virus copy number in lymphoblastoid cell lines:7E-6
240	SV_chr6:126146861:DG	DEL	6	rs4363059	28196072:Male-pattern baldness:6E-10
241	SV_chr6:131999290:FG	INS	6	rs233940	31882771:Glycosyl ceramide (d18:2/24:1, d18:1/24:2) levels in elite athletes:4E-6
242	SV_chr6:139002765:FG	INS	6	rs11961816	29703844:Diabetic kidney disease in type 2 diabetes (ESRD vs. no ESRD):4E-6
243	SV_chr6:146716295:DG	DEL	6	rs61748896	34282934:Vaginal microbiome MetaCyc pathway (PWY0-166|superpathway of pyrimidine deoxyribonucleotides de novo biosynthesis (E. coli)):5E-6
244	SV_chr6:146716295:DG	DEL	6	rs73573698	34282934:Vaginal microbiome MetaCyc pathway (PWY0-166|superpathway of pyrimidine deoxyribonucleotides de novo biosynthesis (E. coli)):5E-6
245	SV_chr6:146716295:DG	DEL	6	rs73573701	34282934:Vaginal microbiome MetaCyc pathway (PWY0-166|superpathway of pyrimidine deoxyribonucleotides de novo biosynthesis (E. coli)):5E-6
246	SV_chr6:146716295:DG	DEL	6	rs9497611	34282934:Vaginal microbiome MetaCyc pathway (PWY0-166|superpathway of pyrimidine deoxyribonucleotides de novo biosynthesis (E. coli)):5E-6
247	SV_chr6:147874652:FG	INS	6	rs11753921	33104735:interferon-related traits:1E-5
248	SV_chr6:149981522:DG	DEL	6	rs4869780	36333282:Aspartate aminotransferase levels:5E-12
249	SV_chr6:152068854:DG	DEL	6	rs9479191	36224396:Height:3E-16
250	SV_chr6:157840144:DG	DEL	6	rs9346930	25575512:Lipoprotein (a) - cholesterol levels:5E-17
251	SV_chr6:158811304:DG	DEL	6	rs3123131	38632349:Alanine aminotransferase levels:1E-12
252	SV_chr6:158811304:DG	DEL	6	rs9347258	29662168:Hair color:1E-77
253	SV_chr6:159665225:DG	DEL	6	rs78659778	35501403:Plasma lead levels:4E-6
254	SV_chr7:1996824:DG	DEL	7	rs1107592	23453885:Autism spectrum disorder, attention deficit-hyperactivity disorder, bipolar disorder, major depressive disorder, and schizophrenia (combined):5E-6
255	SV_chr7:1996824:DG	DEL	7	rs4721295	24166486:Schizophrenia, schizoaffective disorder or bipolar disorder:6E-10
256	SV_chr7:3682523:FG	INS	7	rs6965119	35835914:Insomnia:2E-9
257	SV_chr7:3682523:FG	INS	7	rs6976669	36477530:Smoking initiation:2E-9
258	SV_chr7:14409415:DG	DEL	7	rs17168153	36662838:Severe COVID-19 infection:3E-6
259	SV_chr7:14411639:DG	DEL	7	rs17168153	36662838:Severe COVID-19 infection:3E-6
260	SV_chr7:26168426:FG	INS	7	rs2040786	31669095:Waist circumference adjusted for body mass index:4E-8
261	SV_chr7:32247238:DG	DEL	7	rs12701204	30019117:Adolescent idiopathic scoliosis:1E-6
262	SV_chr7:41775928:FG	INS	7	rs2214873	23823483:Metabolite levels:5E-6
263	SV_chr7:42490264:FG	INS	7	rs10229523	36224396:Height:3E-19
264	SV_chr7:44560573:DG	DEL	7	rs217385	35013273:Total campesterol:6E-15
265	SV_chr7:44560573:DG	DEL	7	rs217386	36193934:Sterol ester (27:1/18:0) levels:3E-7
266	SV_chr7:50570867:DG	DEL	7	rs116298963	28604730:Lung cancer:2E-7
267	SV_chr7:55167521:DG	DEL	7	rs12669749	34648354:Epidermal growth factor receptor levels:9E-18
268	SV_chr7:71746913:DG	DEL	7	rs2024235	30019117:Adolescent idiopathic scoliosis:1E-6
269	SV_chr7:76293162:DG	DEL	7	rs12113288	30595370:Eosinophil counts:3E-8
270	SV_chr7:76977857:DG	DEL	7	rs2245368	36581621:Body mass index:1E-37
271	SV_chr7:77725414:FG	INS	7	rs10264590	30575882:Waist-hip ratio:5E-8
272	SV_chr7:81729021:DG	DEL	7	rs5745695	29875488:Hepatocyte growth factor levels (HGF.2681.23.2):1E-11
273	SV_chr7:83317146:DG	DEL	7	rs7789405	30643256:Well-being spectrum (multivariate analysis):1E-9
274	SV_chr7:84086474:DG	DEL	7	rs13233499	36662838:Resistance to COVID-19 infection (Exposed negative vs positive):3E-8
275	SV_chr7:84086474:DG	DEL	7	rs62477260	36662838:Resistance to COVID-19 infection (Exposed negative vs positive):3E-7
276	SV_chr7:84099065:FG	INS	7	rs7806871	36662838:Resistance to COVID-19 infection (Exposed negative vs positive):9E-12
277	SV_chr7:87468941:FG	INS	7	rs112369941	34594039:Cholelithiasis:3E-8
278	SV_chr7:92122220:FG	INS	7	rs6974607	36357675:X-21467 levels:8E-15
279	SV_chr7:101415876:DG	DEL	7	rs62465642	29617998:Intraocular pressure:3E-8
280	SV_chr7:102081264:TG	INV	7	rs73185898	35361970:Educational attainment:1E-13
281	SV_chr7:104949685:DG	DEL	7	rs2470950	35835914:Insomnia:3E-8
282	SV_chr7:113339566:FG	INS	7	rs12537134	38538606:Body mass index:2E-14
283	SV_chr7:121241042:DG	DEL	7	rs10500083	37500982:Bone mineral density mean:1E-26
284	SV_chr7:121241042:DG	DEL	7	rs11765163	37500982:Bone mineral density mean:1E-26
285	SV_chr7:121241042:DG	DEL	7	rs11771945	37500982:Bone mineral density mean:1E-26
286	SV_chr7:121241042:DG	DEL	7	rs1524507	37500982:Bone mineral density mean:2E-33
287	SV_chr7:121241042:DG	DEL	7	rs1534014	37500982:Bone mineral density mean:2E-36
288	SV_chr7:121241042:DG	DEL	7	rs1534019	37500982:Bone mineral density mean:2E-36
289	SV_chr7:121241042:DG	DEL	7	rs4731000	37500982:Bone mineral density mean:1E-26
290	SV_chr7:121241042:DG	DEL	7	rs4731001	37500982:Bone mineral density mean:3E-36
291	SV_chr7:121241042:DG	DEL	7	rs6466773	37500982:Bone mineral density mean:2E-36
292	SV_chr7:121241042:DG	DEL	7	rs7808120	37500982:Bone mineral density mean:2E-36
293	SV_chr7:128152012:DG	DEL	7	rs111528598	35764056:Attention deficit hyperactivity disorder or autism spectrum disorder or intelligence (pleiotropy):4E-10
294	SV_chr7:142653049:DG	DEL	7	rs1986053	36477530:Drinks per week:2E-10
295	SV_chr7:142976554:FG	INS	7	rs7790515	30019117:Adolescent idiopathic scoliosis:4E-7
296	SV_chr7:147657972:DG	DEL	7	rs78595622	37770476:Long sleep duration (>=10 hours):2E-6
297	SV_chr8:1060329:DG	DEL	8	rs11996703	35361970:Educational attainment:3E-8
298	SV_chr8:3323736:DG.2	DEL	8	rs72507671	31596458:Spatial memory:6E-6
299	SV_chr8:4265362:DG	DEL	8	rs7004794	36477530:Smoking initiation:4E-9
300	SV_chr8:9950380:FG	INS	8	rs682400	30867560:General factor of neuroticism:2E-10
301	SV_chr8:10271520:FG	INS	8	rs6601426	35835914:Insomnia:2E-8
302	SV_chr8:11388049:DG	DEL	8	rs12547100	34021172:Waist-hip index:2E-13
303	SV_chr8:24287795:DG	DEL	8	rs11992342	27018472:Cleft palate:4E-6
304	SV_chr8:25773465:DG	DEL	8	rs7013509	34382107:Inguinal hernia:2E-10
305	SV_chr8:28684944:FG	INS	8	rs181292	31666681:White matter microstructure (axial diusivities):4E-8
306	SV_chr8:28684944:FG	INS	8	rs2856802	36224396:Height:8E-10
307	SV_chr8:31925168:FG	INS	8	rs776389	31882771:Gamma-glutamylglutamine levels in elite athletes:4E-6
308	SV_chr8:59267215:DG	DEL	8	rs7837791	23396134:Refractive error:4E-12
309	SV_chr8:71302510:DG	DEL	8	rs114847962	38116116:Bone density Z-score:3E-8
310	SV_chr8:73371134:FG	INS	8	rs10112386	34910505:Vertex-wise sulcal depth:4E-21
311	SV_chr8:95060002:FG	INS	8	rs11779506	33462484:Gamma glutamyl transferase levels:4E-12
312	SV_chr8:96787835:DG	DEL	8	rs12678667	38565336:Attention deficit hyperactivity disorder or risk-taking behavior (pleiotropy):6E-9
313	SV_chr8:105658290:DG	DEL	8	rs1442330	32888494:Platelet distribution width:1E-13
314	SV_chr8:114606692:DG	DEL	8	rs16886173	25811787:Urate levels (BMI interaction):7E-7
315	SV_chr8:118434805:DG	DEL	8	rs7813395	33067605:Osteoprotegerin levels:1E-18
316	SV_chr8:127599049:DG	DEL	8	rs75607298	29422769:Corneal astigmatism:2E-6
317	SV_chr8:129699950:FG	INS	8	rs77753889	34021172:Hip circumference adjusted for BMI:2E-8
318	SV_chr8:132908422:FG	INS	8	rs853320	31015401:Medication use (thyroid preparations):1E-13
319	SV_chr8:136147952:DG	DEL	8	rs10505648	25574032:Polycystic ovary syndrome:5E-8
320	SV_chr8:140501181:FG	INS	8	rs4246129	28054174:Cleft palate:5E-6
321	SV_chr8:142678700:DG	DEL	8	rs2920280	34594039:Gastric cancer:4E-49
322	SV_chr8:142678700:DG	DEL	8	rs2920281	36753304:Peptic ulcer disease or schizophrenia (pleiotropy):4E-8
323	SV_chr8:142678700:DG	DEL	8	rs2976388	33608531:Peptic ulcer disease:2E-14
324	SV_chr8:143551894:DG	DEL	8	rs10099546	34594039:Monocyte count:7E-10
325	SV_chr8:143931280:DG	DEL	8	rs11136335	32929287:SSC-A on monocyte:2E-9
326	SV_chr8:143931280:DG	DEL	8	rs11136336	30593698:Fat-free mass:8E-7
327	SV_chr8:144279080:DG	DEL	8	rs7816361	38172110:Dupuytren's disease:9E-20
328	SV_chr8:144279080:DG	DEL	8	rs7838717	36914875:Lung function (forced vital capacity):1E-26
329	SV_chr9:4537262:DG	DEL	9	rs10815011	36121873:Leprosy:8E-6
330	SV_chr9:23362803:DG	DEL	9	rs11793831	38335777:Occupational creativity:2E-8
331	SV_chr9:23362803:DG	DEL	9	rs1360380	36224396:Height:4E-42
332	SV_chr9:23362803:DG	DEL	9	rs1360382	38839884:Restless legs syndrome:1E-7
333	SV_chr9:23704136:FG	INS	9	rs11790555	35585065:F-acquired taste liking (derived food-liking factor):1E-9
334	SV_chr9:30345791:DG	DEL	9	rs4879424	36411363:Osteoarthritis:3E-9
335	SV_chr9:33050831:DG	DEL	9	rs7041702	30038396:Educational attainment (MTAG):3E-12
336	SV_chr9:33052241:FG	INS	9	rs11789823	30019117:Adolescent idiopathic scoliosis:3E-6
337	SV_chr9:33126610:FG	INS	9	rs10758189	38412862:CD22/FOLR2 protein level ratio:1E-24
338	SV_chr9:33130550:FG	INS	9	rs10758191	34887591:High density lipoprotein cholesterol levels:8E-10
339	SV_chr9:33130550:FG	INS	9	rs3780490	38658550:Serum urate levels:5E-23
340	SV_chr9:35803099:DG	DEL	9	rs5812	36224396:Height:3E-8
341	SV_chr9:74283473:FG	INS	9	rs2604263	30038396:Highest math class taken (MTAG):4E-10
342	SV_chr9:82418930:DG	DEL	9	rs12551702	36224396:Height:3E-13
343	SV_chr9:95594066:DG	DEL	9	rs12339113	31669095:Waist circumference adjusted for body mass index:2E-8
344	SV_chr9:98546761:DG	DEL	9	rs2808522	36224396:Height:2E-6
345	SV_chr9:101457413:DG	DEL	9	rs2183745	33972514:Liver enzyme levels (alkaline phosphatase):2E-133
346	SV_chr9:106144335:FG	INS	9	rs1516883	29773799:Menarche (age at onset):4E-12
347	SV_chr9:111571011:DG	DEL	9	rs74308680	32778093:Protein quantitative trait loci (liver):3E-9
348	SV_chr9:114319730:DG	DEL	9	rs76870658	37770476:Long sleep duration (>=10 hours):1E-6
349	SV_chr9:119072595:FG	INS	9	rs17220604	36224396:Height:2E-13
350	SV_chr9:121090037:DG	DEL	9	rs10985149	35078996:Serum levels of protein GSN:2E-26
351	SV_chr9:121649215:DG	DEL	9	rs10818576	29212778:Coronary artery disease:8E-9
352	SV_chr9:121649215:DG	DEL	9	rs10818577	34021172:Hip index:2E-8
353	SV_chr9:121879722:DG	DEL	9	rs7037739	37365406:Personality traits or cognitive traits (multivariate analysis):4E-8
354	SV_chr9:132883702:FG	INS	9	rs67035325	30595370:Red cell distribution width:4E-16
355	SV_chr9:133278859:FG	INS	9	rs495828	36224396:Height:3E-46
356	SV_chr9:133278859:FG	INS	9	rs579459	35964923:Hemoglobin concentration:2E-15
357	SV_chr9:133278859:FG	INS	9	rs635634	38689001:Pulse pressure:8E-8
358	SV_chr9:133278859:FG	INS	9	rs651007	37587338:Mitochondrial DNA copy number (adjusted):3E-10
359	SV_chr9:134595834:FG	INS	9	rs7859903	35446358:Central corneal thickness (MTAG):5E-11
360	SV_chr10:3526816:FG	INS	10	rs2066107	30575882:Waist-hip ratio:5E-8
361	SV_chr10:32385137:FG	INS	10	rs4749723	32888493:Mean platelet volume:3E-10
362	SV_chr10:33728838:DG	DEL	10	rs36051838	32541925:Type 2 diabetes:5E-8
363	SV_chr10:33728838:DG	DEL	10	rs79969674	37106081:BMI (standard GWA):4E-9
364	SV_chr10:34282095:FG	INS	10	rs16935275	36224396:Height:5E-42
365	SV_chr10:38784408:FG	INS	10	rs12777211	32916098:Electrocardiogram morphology (amplitude at temporal datapoints):5E-8
366	SV_chr10:52707168:FG	INS	10	rs11814440	36224396:Height:3E-39
367	SV_chr10:52707168:FG	INS	10	rs7088220	28869591:Heel bone mineral density:2E-12
368	SV_chr10:68874568:DG	DEL	10	rs2394495	34560273:Cortical thickness:2E-10
369	SV_chr10:73659955:TG	INV	10	rs10824026	29290336:Atrial fibrillation:2E-6
370	SV_chr10:73659955:TG	INV	10	rs4746140	36050321:QT interval:5E-10
371	SV_chr10:73659955:TG	INV	10	rs6480708	29892015:Atrial fibrillation:6E-27
372	SV_chr10:83762959:DG	DEL	10	rs66834924	31530798:Supramarginal gyrus volume:5E-6
373	SV_chr10:84223487:FG	INS	10	rs12217769	30535121:Macular thickness:2E-8
374	SV_chr10:87613909:FG	INS	10	rs12412058	36357675:X-13553 levels:2E-10
375	SV_chr10:91873578:DG	DEL	10	rs11186719	35192695:Sex hormone-binding globulin levels:1E-13
376	SV_chr10:112352423:DG	DEL	10	rs943262	30038396:Highest math class taken (MTAG):3E-15
377	SV_chr10:120467142:DG	DEL	10	rs2478432	33462482:OTU97_53 (Bacteroides) prevalence:5E-6
378	SV_chr10:126417903:DG	DEL	10	rs4246191	35446358:Corneal resistance factor (MTAG):3E-9
379	SV_chr10:132606349:FG	INS	10	rs113564514	34282934:Vaginal microbiome MetaCyc pathway (PWY-7007|methyl ketone biosynthesis):3E-6
380	SV_chr10:132637331:DG	DEL	10	rs73401227	34282934:Vaginal microbiome MetaCyc pathway (PWY-7007|methyl ketone biosynthesis):3E-6
381	SV_chr11:2749570:FG	INS	11	rs112899037	37277458:Multi-trait sex score:6E-12
382	SV_chr11:2749570:FG	INS	11	rs186376420	34021172:Hip circumference adjusted for BMI:9E-9
383	SV_chr11:5808285:DG	DEL	11	rs1453414	27749845:Oropharynx cancer:4E-6
384	SV_chr11:27635716:DG	DEL	11	rs7106058	36477530:Smoking initiation:1E-33
385	SV_chr11:32366523:FG	INS	11	rs11031749	34021172:Waist-to-hip ratio adjusted for BMI:3E-8
386	SV_chr11:32870497:FG	INS	11	rs11032044	34382107:Inguinal hernia:8E-13
387	SV_chr11:43855889:FG	INS	11	rs1061810	30297969:Type 2 diabetes:6E-13
388	SV_chr11:43855889:FG	INS	11	rs11555762	29273807:Body mass index:5E-14
389	SV_chr11:43855889:FG	INS	11	rs35251247	36357675:X-18886 levels:4E-17
390	SV_chr11:43855889:FG	INS	11	rs57635800	38538606:Body mass index:1E-15
391	SV_chr11:48579304:DG	DEL	11	rs12800770	31882771:N-acetyl-aspartyl-glutamate (NAAG) levels in elite athletes:7E-9
392	SV_chr11:62177315:DG	DEL	11	rs10897222	36121873:Leprosy:6E-6
393	SV_chr11:63893357:FG	INS	11	rs10897459	34887591:Total cholesterol levels:9E-12
394	SV_chr11:65874636:DG	DEL	11	rs2234458	37280435:Body mass index:5E-21
395	SV_chr11:65874636:DG	DEL	11	rs2303384	37280435:Childhood body mass index:4E-13
396	SV_chr11:65874636:DG	DEL	11	rs2303385	31816047:Retinal detachment or retinal break:1E-6
397	SV_chr11:65874636:DG	DEL	11	rs625652	34594039:Body mass index:3E-18
398	SV_chr11:74656966:FG	INS	11	rs7128944	34910505:Vertex-wise cortical surface area:1E-10
399	SV_chr11:74821359:DG	DEL	11	rs503855	36224396:Height:1E-88
400	SV_chr11:82643721:FG	INS	11	rs949247	34982113:Essential tremor:2E-7
401	SV_chr11:98903959:FG	INS	11	rs7945465	35361970:Educational attainment:1E-10
402	SV_chr11:103217199:DG	DEL	11	rs680071	34594039:Serum uric acid levels:2E-9
403	SV_chr11:104139745:DG	DEL	11	rs361269	36893272:Occipital area (unadjusted for global measures):3E-13
404	SV_chr11:114515737:DG	DEL	11	rs12420560	35078996:Serum levels of protein FCN2:4E-25
405	SV_chr11:114515737:DG	DEL	11	rs12420571	34648354:Annexin A13 levels:3E-16
406	SV_chr11:114515737:DG	DEL	11	rs4466877	23382691:IgG glycosylation:9E-7
407	SV_chr11:114519963:FG	INS	11	rs7103402	34814699:Ficolin-2 levels:4E-20
408	SV_chr11:114519963:FG	INS	11	rs9326244	23382691:IgG glycosylation:5E-7
409	SV_chr11:116687997:FG	INS	11	rs12799449	36376304:Triglyceride levels (MTAG):3E-167
410	SV_chr11:116687997:FG	INS	11	rs12799766	37277458:Multi-trait sex score:5E-8
411	SV_chr11:118682986:FG	INS	11	rs592280	37253714:Metabolite levels (trehalose):3E-47
412	SV_chr11:128173070:DG	DEL	11	rs10893829	30297969:Type 2 diabetes:1E-10
413	SV_chr12:919619:DG	DEL	12	rs7962050	32888493:Mean corpuscular hemoglobin:5E-11
414	SV_chr12:7471584:FG	INS	12	rs117692263	34648354:Kallikrein-7 levels:5E-17
415	SV_chr12:14266242:FG	INS	12	rs11055887	30239722:Waist-hip ratio:4E-9
416	SV_chr12:14266242:FG	INS	12	rs11055888	36376304:Body mass index (MTAG):2E-8
417	SV_chr12:18215864:FG	INS	12	rs73067158	37009413:Tuberculosis:9E-6
418	SV_chr12:30765358:DG	DEL	12	rs12824388	38052102:Spontaneous dizygotic twinning:1E-6
419	SV_chr12:48331683:DG	DEL	12	rs2732441	37247657:Idiopathic knee osteoarthritis:1E-8
420	SV_chr12:49076229:DG	DEL	12	rs12821008	36376304:Body mass index (MTAG):6E-10
421	SV_chr12:49878065:DG	DEL	12	rs1248264	31669095:Body mass index:7E-16
422	SV_chr12:51403105:DG	DEL	12	rs9795910	34594039:Gamma glutamyl transpeptidase:1E-14
423	SV_chr12:51960973:DG	DEL	12	rs11610143	30289880:Social science traits (pleiotropy) (HIPO component 1):6E-8
424	SV_chr12:51960973:DG	DEL	12	rs11612312	37464041:Depression:1E-9
425	SV_chr12:53930528:FG	INS	12	rs2366142	34021172:Waist-to-hip ratio adjusted for BMI:3E-12
426	SV_chr12:53930528:FG	INS	12	rs7301643	34021172:A body shape index:3E-8
427	SV_chr12:56359452:FG	INS	12	rs2066819	23143594:Psoriasis:5E-17
428	SV_chr12:57965274:FG	INS	12	rs7954291	35764056:Attention deficit hyperactivity disorder or autism spectrum disorder or intelligence (pleiotropy):2E-9
429	SV_chr12:64029803:FG	INS	12	rs6581526	30019117:Adolescent idiopathic scoliosis:2E-17
430	SV_chr12:71131685:FG	INS	12	rs2270588	24869959:Upper eyelid sagging severity:2E-6
431	SV_chr12:72331360:DG	DEL	12	rs12821309	36477530:Smoking initiation:1E-12
432	SV_chr12:72331360:DG	DEL	12	rs3858590	36477530:Smoking initiation:2E-11
433	SV_chr12:72331360:DG	DEL	12	rs4277154	36477530:Smoking initiation:1E-12
434	SV_chr12:80805952:FG	INS	12	rs10862191	36662838:Severe COVID-19 infection:9E-20
435	SV_chr12:87944382:FG	INS	12	rs10745460	32541925:Type 2 diabetes:4E-8
436	SV_chr12:90238492:DG	DEL	12	rs2579103	25673413:Body mass index:4E-7
437	SV_chr12:90238492:DG	DEL	12	rs2579106	36581621:Body mass index:2E-14
438	SV_chr12:101708628:DG	DEL	12	rs1544922	36224396:Height:2E-22
439	SV_chr12:105044600:FG	INS	12	rs7302857	36662838:Resistance to COVID-19 infection (Exposed negative vs positive):5E-7
440	SV_chr12:105044600:FG	INS	12	rs7313946	36662838:Resistance to COVID-19 infection (Exposed negative vs positive):3E-9
441	SV_chr12:111858637:DG	DEL	12	rs7309505	38277453:Daily alcohol intake in rs671 GA genotype:6E-39
442	SV_chr12:115771111:DG	DEL	12	rs10850564	35762941:Diastolic blood pressure:6E-10
443	SV_chr12:123945973:FG	INS	12	rs11057401	29212778:Coronary artery disease:2E-8
444	SV_chr12:123945973:FG	INS	12	rs4930725	37277458:Multi-trait sex score:7E-16
445	SV_chr12:123945973:FG	INS	12	rs4930726	32541925:Type 2 diabetes:8E-18
446	SV_chr12:128698134:DG	DEL	12	rs12829696	32998964:Multiple severe cisplatin-induced neurotixicitiies in testicular cancer survivors:9E-7
447	SV_chr12:129924626:DG	DEL	12	rs825885	30378284:Full scale intelligence quotient (cesarean section interaction):9E-6
448	SV_chr13:22000537:DG	DEL	13	rs17074792	33226468:Pediatric central nervous system tumors (early onset)(pleiotropy):2E-6
449	SV_chr13:31066564:FG	INS	13	rs4941735	30038396:Cognitive performance (MTAG):3E-8
450	SV_chr13:31317892:FG	INS	13	rs9544436	30595370:Heel bone mineral density:3E-8
451	SV_chr13:36840328:DG	DEL	13	rs609418	25948407:Perioperative myocardial infarction in coronary artery bypass surgery:6E-6
452	SV_chr13:36994603:FG	INS	13	rs17054796	22205395:Interleukin-10 levels:2E-7
453	SV_chr13:37497803:DG	DEL	13	rs4941870	36224396:Height:7E-18
454	SV_chr13:41003395:DG	DEL	13	rs7335629	36224396:Height:3E-24
455	SV_chr13:42457884:TG	INV	13	rs12430303	33106285:Arthritis (juvenile idiopathic):2E-9
456	SV_chr13:43754051:FG	INS	13	rs4143229	29700475:Depression:3E-8
457	SV_chr13:50495210:DG	DEL	13	rs1327653	33398198:Prostate cancer:1E-8
458	SV_chr13:55367043:DG	DEL	13	rs3105049	35585065:Baked/steamed fish liking:6E-14
459	SV_chr13:62146932:FG	INS	13	rs66674732	32376654:Adult body size:7E-9
460	SV_chr13:62146932:FG	INS	13	rs66761698	31669095:Body mass index:1E-8
461	SV_chr13:64768295:DG	DEL	13	rs66481224	30038396:Self-reported math ability (MTAG):2E-8
462	SV_chr13:64922698:FG	INS	13	rs28447350	31220337:Statin-induced myopathy (severe):5E-7
463	SV_chr13:67329322:FG	INS	13	rs3013580	28437668:Venlafaxine response in generalised anxiety disorder (responders vs non-responders after 24 weeks):2E-6
464	SV_chr13:69096619:FG	INS	13	rs2152701	29942085:Neuroticism:1E-8
465	SV_chr13:71903126:DG	DEL	13	rs2061543	36224396:Height:1E-18
466	SV_chr13:89713019:FG	INS	13	rs7326018	36477530:Smoking initiation:2E-11
467	SV_chr13:103439414:DG	DEL	13	rs673358	33462482:OTU97_58 (Sutterellaceae) abundance:4E-6
468	SV_chr13:106570519:DG	DEL	13	rs61965347	34594039:Alanine aminotransferase levels:3E-8
469	SV_chr13:106570519:DG	DEL	13	rs9583095	38632349:Alanine aminotransferase levels:3E-10
470	SV_chr13:108614841:DG	DEL	13	rs75764673	31959993:Vertical cup-disc ratio (multi-trait analysis):2E-12
471	SV_chr13:113804613:DG	DEL	13	rs9329350	23382691:IgG glycosylation:8E-6
472	SV_chr14:21310027:DG	DEL	14	rs4981370	32231278:Refractive error:6E-9
473	SV_chr14:22413264:FG	INS	14	rs760018	37315093:Dupuytren's disease:5E-20
474	SV_chr14:32922766:DG	DEL	14	rs7141672	35835914:Insomnia:9E-9
475	SV_chr14:39629187:DG	DEL	14	rs2415554	37280435:Body mass index:2E-9
476	SV_chr14:40123224:FG	INS	14	rs4989895	36224396:Height:6E-13
477	SV_chr14:65139639:DG	DEL	14	rs61987429	32042192:Total testosterone levels:9E-10
478	SV_chr14:68441270:TG	INV	14	rs11158743	36224396:Height:1E-10
479	SV_chr14:75054235:DG	DEL	14	rs116839793	35870639:Acylphosphatase-1 level in Chronic kidney disease with hypertension and no diabetes (20370_6):5E-13
480	SV_chr14:93576966:DG	DEL	14	rs12586978	36224396:Height:2E-13
481	SV_chr14:94558268:FG	INS	14	rs7158855	34814699:Kallistatin levels:1E-50
482	SV_chr15:25686249:DG	DEL	15	rs10152552	30369944:HOMA-B (corrected for HOMA-IR):6E-9
483	SV_chr15:36132570:FG	INS	15	rs11073153	37464041:Depression:7E-8
484	SV_chr15:39080172:DG	DEL	15	rs716980	36893272:Inferior parietal area (unadjusted for global measures):1E-12
485	SV_chr15:39484361:FG	INS	15	rs78304521	33821002:Brain shape (segment 47):7E-24
486	SV_chr15:41725537:DG	DEL	15	rs2950446	37280435:Body mass index:4E-9
487	SV_chr15:47215131:FG	INS	15	rs12903078	37365406:Personality traits or cognitive traits (multivariate analysis):4E-11
488	SV_chr15:48258064:DG	DEL	15	rs12593807	32888493:Lymphocyte count:5E-13
489	SV_chr15:50454975:DG	DEL	15	rs34269292	30487518:Mean arterial pressure:3E-9
490	SV_chr15:62413893:DG	DEL	15	rs2471032	30595370:Heel bone mineral density:4E-12
491	SV_chr15:63082393:FG	INS	15	rs2652805	36477530:Drinks per week:6E-11
492	SV_chr15:63082393:FG	INS	15	rs2652806	36477530:Drinks per week:6E-11
493	SV_chr15:67112336:DG	DEL	15	rs2118611	31043758:Offspring birth weight:2E-8
494	SV_chr15:67112336:DG	DEL	15	rs2118612	36224396:Height:5E-6
495	SV_chr15:67242127:DG	DEL	15	rs12900708	35710981:Estimated glomerular filtration rate (creatinine):4E-12
496	SV_chr15:73690969:FG	INS	15	rs8041181	33339817:Gamma glutamyl transferase levels:8E-12
497	SV_chr15:73690969:FG	INS	15	rs8041523	38632349:Gamma glutamyl transferase levels:8E-73
498	SV_chr15:75123269:FG	INS	15	rs4886659	30598549:Heel bone mineral density:1E-12
499	SV_chr15:76431161:FG	INS	15	rs16968212	35172313:Enamel hypoplasia:3E-6
500	SV_chr15:76533664:FG	INS	15	rs284884	38658550:Serum urate levels:4E-13
501	SV_chr15:78644313:FG	INS	15	rs11633223	31484785:Parental longevity (father's age at death or father's attained age):4E-8
502	SV_chr15:78785998:FG	INS	15	rs11072804	26634245:Post bronchodilator FEV1/FVC ratio:9E-7
503	SV_chr15:78785998:FG	INS	15	rs11072805	26634245:Post bronchodilator FEV1/FVC ratio:1E-6
504	SV_chr15:78785998:FG	INS	15	rs11072806	26634245:Post bronchodilator FEV1/FVC ratio:1E-6
505	SV_chr15:78785998:FG	INS	15	rs12899147	26634245:Post bronchodilator FEV1/FVC ratio:6E-7
506	SV_chr15:78785998:FG	INS	15	rs1825087	26634245:Post bronchodilator FEV1/FVC ratio:1E-6
507	SV_chr15:78791921:DG	DEL	15	rs12903203	26634245:Post bronchodilator FEV1/FVC ratio:8E-7
508	SV_chr15:78791921:DG	DEL	15	rs2277545	26634245:Post bronchodilator FEV1/FVC ratio:1E-6
509	SV_chr15:78791921:DG	DEL	15	rs2277546	26634245:Post bronchodilator FEV1/FVC ratio:1E-6
510	SV_chr15:78791921:DG	DEL	15	rs4886592	26634245:Post bronchodilator FEV1/FVC ratio:2E-6
511	SV_chr15:95148444:TG	INV	15	rs6650529	32888494:Red blood cell count:5E-9
512	SV_chr16:406785:DG	DEL	16	rs3743890	34648354:Peroxisomal 2,4-dienoyl-CoA reductase levels:9E-936
513	SV_chr16:13981765:DG	DEL	16	rs13334552	35245370:Mitral valve prolapse:7E-10
514	SV_chr16:54626444:DG	DEL	16	rs72622262	35210625:Brugada syndrome:1E-11
515	SV_chr16:61582383:FG	INS	16	rs7195559	30038396:Self-reported math ability:2E-9
516	SV_chr16:61582383:FG	INS	16	rs7200440	30038396:Self-reported math ability (MTAG):2E-12
517	SV_chr16:69369108:FG	INS	16	rs3785074	35530816:Telomere length:5E-14
518	SV_chr16:76134750:DG	DEL	16	rs2288059	26584805:Delta-5 desaturase activity:6E-6
519	SV_chr16:76134750:DG	DEL	16	rs2288061	26584805:Delta-5 desaturase activity:7E-6
520	SV_chr16:82131081:FG	INS	16	rs6420432	37770476:Long sleep duration (>=10 hours):7E-6
521	SV_chr16:87794755:DG	DEL	16	rs73249112	28441456:Facial morphology (factor 4, facial height related to vertical position of gnathion):2E-6
522	SV_chr16:87845516:FG	INS	16	rs4843718	33414548:Kynurenine levels:1E-108
523	SV_chr16:87845516:FG	INS	16	rs8050771	35995766:Kynurenine levels:5E-14
524	SV_chr16:87845516:FG	INS	16	rs8051149	24816252:Kynurenine levels:9E-26
525	SV_chr16:88256858:FG	INS	16	rs11860207	34560273:Cortical surface area:9E-12
526	SV_chr16:88909579:FG	INS	16	rs1559446	34648354:Pancreatic triacylglycerol lipase levels:2E-13
527	SV_chr16:88909579:FG	INS	16	rs1673931	30595370:Neuroticism:1E-7
528	SV_chr16:88909579:FG	INS	16	rs529900	34648354:Trypsin-3 levels:9E-19
529	SV_chr16:88909579:FG	INS	16	rs7404039	34648354:Chymotrypsin-like elastase family member 2A levels:3E-31
530	SV_chr16:88909579:FG	INS	16	rs7405380	34128465:Pancreas fat:6E-13
531	SV_chr16:88909579:FG	INS	16	rs8058234	34648354:Trypsin-1 levels:2E-19
532	SV_chr16:89299371:DG.2	DEL	16	rs72803314	32888493:Neutrophil count:5E-12
533	SV_chr16:89649132:DG	DEL	16	rs4785699	36672889:Red vs non-red hair color:3E-8
534	SV_chr17:758932:FG	INS	17	rs60688493	35386118:Cortical thickness:4E-6
535	SV_chr17:835684:DG	DEL	17	rs8066620	30598549:Heel bone mineral density:2E-19
536	SV_chr17:2291626:DG	DEL	17	rs12941836	34594039:Hemoglobin:5E-10
537	SV_chr17:13141830:FG	INS	17	rs7210118	35164939:Brain morphology (MOSTest):1E-13
538	SV_chr17:16330606:FG	INS	17	rs1476810	36477530:Smoking initiation:6E-13
539	SV_chr17:16330606:FG	INS	17	rs4792732	36477530:Smoking initiation:7E-13
540	SV_chr17:17831079:FG	INS	17	rs12938501	34560273:Cortical surface area:8E-17
541	SV_chr17:19013597:FG	INS	17	rs2472707	33462482:TestASV_37 (Ruminococcaceae) abundance:6E-6
542	SV_chr17:28692261:DG.2	DEL	17	rs12601110	34887591:Total cholesterol levels:1E-23
543	SV_chr17:30156248:FG	INS	17	rs7211246	27659466:QRS complex (12-leadsum):6E-9
544	SV_chr17:31771729:DG	DEL	17	rs34441237	37945903:Prostate cancer:4E-17
545	SV_chr17:32276728:DG	DEL	17	rs12950382	30696823:Chronotype:5E-8
546	SV_chr17:46277763:DG	DEL	17	rs371894855	33875891:IDP dMRI TBSS ICVF Posterior limb of internal capsule R:2E-20
547	SV_chr17:48539858:FG	INS	17	rs6504340	20195514:Primary tooth development (number of teeth):6E-7
548	SV_chr17:50588357:FG	INS	17	rs757416	32439900:PR interval:3E-25
549	SV_chr17:57610448:DG	DEL	17	rs11079312	36224396:Height:9E-9
550	SV_chr17:57703059:FG	INS	17	rs740441	36224396:Height:2E-34
551	SV_chr17:63488529:FG	INS	17	rs4335	32541925:Type 2 diabetes:1E-15
552	SV_chr17:63488529:FG	INS	17	rs4343	36224396:Height:2E-24
553	SV_chr17:63488529:FG	INS	17	rs4344	30072576:Blood protein levels:9E-136
554	SV_chr17:63488529:FG	INS	17	rs4351	24816252:X-14189--leucylalanine levels:4E-22
555	SV_chr17:63654315:FG	INS	17	rs8075273	36376304:Body mass index (MTAG):1E-13
556	SV_chr17:68431763:FG	INS	17	rs11077558	33462484:Creatinine levels:1E-12
557	SV_chr17:68431763:FG	INS	17	rs6501468	31152163:Estimated glomerular filtration rate:1E-9
558	SV_chr17:70163783:DG	DEL	17	rs8066863	34594039:Weight:2E-9
559	SV_chr17:71928524:DG	DEL	17	rs10083886	36224396:Height:4E-194
560	SV_chr17:71928524:DG	DEL	17	rs2158917	36224396:Height:5E-11
561	SV_chr17:82122432:FG	INS	17	rs6502059	38412862:DCXR/SCLY protein level ratio:3E-67
562	SV_chr17:82227616:DG	DEL	17	rs11077983	27082954:Peripheral arterial disease (traffic-related air pollution interaction):6E-7
563	SV_chr17:82386039:DG	DEL	17	rs7503424	35078996:Serum levels of protein P4HB:1E-12
564	SV_chr18:1803865:FG	INS	18	rs16942094	35680011:Mortality in COVID-19:4E-6
565	SV_chr18:1840278:FG	INS	18	rs60764613	36477530:Smoking initiation:2E-19
566	SV_chr18:1840278:FG	INS	18	rs7238896	34594039:Body mass index:7E-13
567	SV_chr18:1840278:FG	INS	18	rs8097544	31190057:Breakfast skipping:2E-17
568	SV_chr18:1840278:FG	INS	18	rs8097672	36581621:Body mass index:6E-23
569	SV_chr18:1840278:FG	INS	18	rs9955276	37280435:Body mass index:1E-14
570	SV_chr18:4813797:DG	DEL	18	rs79349575	28566273:Type 2 diabetes:4E-8
571	SV_chr18:5492282:DG	DEL	18	rs59232921	35051171:Body mass index:7E-6
572	SV_chr18:7909702:DG	DEL	18	rs73379947	35893037:Type 2 diabetes:4E-22
573	SV_chr18:9621931:DG	DEL	18	rs1787166	34648354:Ras-related protein Rab-31 levels:6E-12
574	SV_chr18:9621931:DG	DEL	18	rs62088920	38064665:Mean platelet volume during first trimester of pregnancy:2E-8
575	SV_chr18:9621931:DG	DEL	18	rs7234128	32888493:Platelet count:3E-25
576	SV_chr18:9815263:DG	DEL	18	rs16955697	31882771:Taurolithocholate 3-sulfate levels in elite athletes:6E-6
577	SV_chr18:26991656:DG	DEL	18	rs1436904	29059683:Breast cancer:1E-14
578	SV_chr18:40426410:DG	DEL	18	rs4799541	32665545:Brain morphology (MOSTest):2E-8
579	SV_chr18:40426410:DG	DEL	18	rs7236534	32572223:Gut microbiota (bacterial taxa, hurdle binary method):8E-6
580	SV_chr18:40426410:DG	DEL	18	rs73429770	38811844:T1 FreeSurfer aseg Left-Cerebellum-White-Matter:5E-6
581	SV_chr18:49452650:DG	DEL	18	rs28862462	34021172:Hip circumference adjusted for BMI:1E-8
582	SV_chr18:54342407:DG	DEL	18	rs1657880	38689001:Diastolic blood pressure:4E-12
583	SV_chr18:69616406:DG	DEL	18	rs10513968	24483146:Response to cytidine analogues (gemcitabine):1E-6
584	SV_chr18:75012270:DG	DEL	18	rs28628075	35396580:Schizophrenia:7E-6
585	SV_chr18:75712365:DG	DEL	18	rs9951002	32888494:Platelet count:2E-9
586	SV_chr18:76423584:DG.6	DEL	18	rs8084155	37492107:Diverticular disease:5E-8
587	SV_chr18:79463474:FG	INS	18	rs9958919	31669095:Waist circumference adjusted for body mass index:2E-16
588	SV_chr19:2153879:DG	DEL	19	rs12985850	37277458:Multi-trait sex score:2E-13
589	SV_chr19:7131008:FG	INS	19	rs2860175	36224396:Height:5E-35
590	SV_chr19:7258351:DG	DEL	19	rs12978472	38689001:Pulse pressure:2E-25
591	SV_chr19:11184166:DG	DEL	19	rs111831594	38200128:Triglyceride to HDL cholesterol ratio:6E-8
592	SV_chr19:11184166:DG	DEL	19	rs17678527	30595370:Red cell distribution width:9E-34
593	SV_chr19:11184166:DG	DEL	19	rs74179972	30595370:Cardiovascular disease:4E-10
594	SV_chr19:12584062:DG	DEL	19	rs7247513	21254220:Bipolar disorder:2E-6
595	SV_chr19:15873260:DG	DEL	19	rs117272295	36357675:Adipoylcarnitine levels:2E-27
596	SV_chr19:15873260:DG	DEL	19	rs62107766	36635386:Octadecenedioate (C18:1-DC) levels:2E-23
597	SV_chr19:18131348:DG	DEL	19	rs11666906	38632349:Alanine aminotransferase levels:1E-29
598	SV_chr19:18131348:DG	DEL	19	rs885683	35213538:Free cholesterol to total lipids ratio in chylomicrons and extremely large VLDL:1E-9
599	SV_chr19:30526427:DG	DEL	19	rs11668301	36581621:Body mass index:2E-23
600	SV_chr19:30526427:DG	DEL	19	rs73026723	37280435:Body mass index:1E-16
601	SV_chr19:30556875:FG	INS	19	rs8101081	36224396:Height:3E-66
602	SV_chr19:35022695:FG	INS	19	rs66528626	33462484:Serum albumin levels:4E-9
603	SV_chr19:38687977:DG	DEL	19	rs35941349	32888493:Platelet count:5E-43
604	SV_chr19:38687977:DG	DEL	19	rs62121823	34594039:Platelet count:9E-29
605	SV_chr19:39031690:FG	INS	19	rs3848623	32473944:Deliberate self-harm:5E-6
606	SV_chr19:39031690:FG	INS	19	rs7259801	32473944:Deliberate self-harm:4E-6
607	SV_chr19:45010313:FG	INS	19	rs9749077	35851147:Alzheimer's disease or gastroesophageal reflux disease:9E-8
608	SV_chr19:46119477:DG	DEL	19	rs73048030	32180562:Spontaneous adipocyte lipolysis:1E-8
609	SV_chr19:51273153:DG	DEL	19	rs12975233	36168886:Myeloid cell surface antigen CD33 levels:1E-24
610	SV_chr19:51273153:DG	DEL	19	rs8111074	32376654:Adult body size:3E-8
611	SV_chr19:54219897:DG	DEL	19	rs255773	31043758:Birth weight:1E-11
612	SV_chr19:54219897:DG	DEL	19	rs255774	31097437:Birth weight:1E-8
613	SV_chr19:56963537:DG	DEL	19	rs7257519	30718454:Depressive symptoms x dependent stressful life events interaction (2df test):5E-6
614	SV_chr20:393038:DG	DEL	20	rs62191444	27989323:Interleukin-17 levels:4E-6
615	SV_chr20:1408499:DG	DEL	20	rs4814229	36224396:Height:2E-12
616	SV_chr20:3041109:DG	DEL	20	rs3761244	34648354:Progonadoliberin-2 levels:2E-81
617	SV_chr20:3257976:DG	DEL	20	rs2007022	30595370:Height:2E-14
618	SV_chr20:10397258:FG	INS	20	rs6133897	34282934:Vaginal microbiome MetaCyc pathway (ENTBACSYN-PWY|enterobactin biosynthesis):7E-6
619	SV_chr20:12983139:FG	INS	20	rs2876240	34503513:Sphingomyelin(37:1)_[M+H]1+ levels:2E-12
620	SV_chr20:12983139:FG	INS	20	rs3848750	34503513:Sphingomyelin(37:1)_[M+H]1+ levels:7E-12
621	SV_chr20:12983139:FG	INS	20	rs3848751	34503513:Sphingomyelin(37:1)_[M+H]1+ levels:7E-12
622	SV_chr20:12983139:FG	INS	20	rs3848752	34503513:Sphingomyelin(37:1)_[M+H]1+ levels:7E-12
623	SV_chr20:12983139:FG	INS	20	rs3910136	34503513:Sphingomyelin(37:1)_[M+H]1+ levels:9E-12
624	SV_chr20:12983139:FG	INS	20	rs6074537	34503513:Sphingomyelin(37:1)_[M+H]1+ levels:5E-11
625	SV_chr20:12983139:FG	INS	20	rs6078855	34503513:Sphingomyelin(37:1)_[M+H]1+ levels:6E-11
626	SV_chr20:12983139:FG	INS	20	rs6078856	34503513:Sphingomyelin(37:1)_[M+H]1+ levels:6E-11
627	SV_chr20:15321085:DG	DEL	20	rs6135385	30038396:Self-reported math ability (MTAG):9E-9
628	SV_chr20:15321085:DG	DEL	20	rs7270966	36224396:Height:4E-24
629	SV_chr20:15454656:DG	DEL	20	rs6034195	35393526:Ceramide (d43:1) levels:1E-9
630	SV_chr20:22117027:DG	DEL	20	rs7362397	28196072:Male-pattern baldness:3E-65
631	SV_chr20:22117027:DG	DEL	20	rs7362398	28196072:Male-pattern baldness:3E-65
632	SV_chr20:24923061:DG	DEL	20	rs4462848	37596262:Eosinophil side fluorescence:2E-41
633	SV_chr20:25248020:FG	INS	20	rs6115101	33875891:wg rh intensity-contrast supramarginal:3E-11
634	SV_chr20:34528006:DG	DEL	20	rs6059896	35654975:Chronic elevation of alanine aminotransferase (cALT) levels:2E-13
635	SV_chr20:34889369:DG	DEL	20	rs6087644	37277458:Multi-trait sex score:2E-8
636	SV_chr20:35149141:FG	INS	20	rs3761141	37277458:Multi-trait sex score:3E-13
637	SV_chr20:41912429:DG	DEL	20	rs987783	23823483:Metabolite levels:3E-7
638	SV_chr20:50327391:FG	INS	20	rs6122906	29059683:Breast cancer:3E-10
639	SV_chr20:52167425:DG	DEL	20	rs72626581	25065397:Reading disability or specific language impairment (pleiotropy):6E-6
640	SV_chr20:57979495:DG	DEL	20	rs11696251	33547301:Serum alkaline phosphatase levels:1E-9
641	SV_chr20:57979495:DG	DEL	20	rs4455225	30595370:Heel bone mineral density:6E-10
642	SV_chr20:57979495:DG	DEL	20	rs6123756	33462484:Serum alkaline phosphatase levels:3E-10
643	SV_chr20:59148389:DG	DEL	20	rs73306860	30595370:Systolic blood pressure:2E-42
644	SV_chr20:59181783:FG	INS	20	rs16982520	35760791:Cryptic phenotype that captures autosomal dominant polycystic kidney disease severity:3E-9
645	SV_chr20:61309356:DG	DEL	20	rs6028103	35361970:Educational attainment:5E-14
646	SV_chr20:63777047:DG	DEL	20	rs3810496	36477530:Smoking initiation:2E-22
647	SV_chr21:25452819:DG	DEL	21	rs8127977	23648065:Adverse response to chemotherapy (neutropenia/leucopenia) (all antimetabolite drugs):2E-6
648	SV_chr21:29179903:DG	DEL	21	rs7276548	36333282:Gamma glutamyl transferase levels:2E-14
649	SV_chr22:17911873:FG	INS	22	rs4819649	35047847:Nonalcoholic fatty liver disease (imputed):4E-11
650	SV_chr22:35249171:DG	DEL	22	rs5750089	34594039:Height:2E-14
651	SV_chr22:40398219:DG	DEL	22	rs147122512	31393916:High density lipoprotein cholesterol levels:2E-8
652	SV_chr22:40398219:DG	DEL	22	rs73167022	38538606:Postmenopausal breast cancer:7E-8
653	SV_chr22:43153319:DG	DEL	22	rs138909	30595370:White blood cell count:2E-13
654	SV_chr22:44661126:DG	DEL	22	rs136904	36224396:Height:1E-12
655	SV_chr22:44856563:DG	DEL	22	rs726170	29391396:Binge eating behaviour in bipolar disorder:3E-8
656	SV_chr22:45967454:DG	DEL	22	rs10453441	28171582:Central corneal thickness:6E-9
657	SV_chr22:45967454:DG	DEL	22	rs10453459	36246171:Axial length:3E-27
658	SV_chr22:49364434:DG	DEL	22	rs2269520	34282934:Vaginal microbiome MetaCyc pathway (PWY-3781|aerobic respiration I (cytochrome c)):5E-6
659	SV_chr22:49917986:FG	INS	22	rs9616380	36224396:Height:1E-8

## Sheet: Supplementary Table 3
Supplementary Table 3. List of ACMG genes affected by SVs in their coding sequences
SV_ID	CHR	Start position	End position	SV length	SV type	Gene name	Location1	Location2
1_161375124_161377012_DEL_1	1	161375124	161377012	1888	DEL	SDHC	exon5-txEnd	3'UTR
2_178599397_178599523_DEL_1	2	178599397	178599523	126	DEL	TTN	intron239-exon240	CDS
3_14134700_14139260_DEL_1	3	14134700	14139260	4560	DEL	TMEM43	intron7-exon11	CDS
6_123512257_123512312_DEL_1	6	123512257	123512312	54	DEL	TRDN	exon7-intron7	CDS
7_128835452_128837475_DEL_1	7	128835452	128837475	2023	DEL	FLNC	exon2-exon4	CDS
11_2847682_2848053_DEL_1	11	2847682	2848053	371	DEL	KCNQ1	intron15-exon16	CDS-3'UTR
11_47350110_47350481_DEL_1	11	47350110	47350481	371	DEL	MYBPC3	intron3-exon4	CDS
12_32842942_32843250_DEL_1	12	32842942	32843250	308	DEL	PKP2	exon6-intron6	CDS
12_51922723_51923472_DEL_1	12	51922723	51923472	748	DEL	ACVRL1	exon10-txEnd	3'UTR
14_65076663_65077912_DEL_1	14	65076663	65077912	1249	DEL	MAX	intron4-exon6	CDS
16_2089303_2089360_DEL_1	16	2089303	2089360	57	DEL	TSC2	exon42-exon42	3'UTR
17_43101397_43106468_DEL_1	17	43101397	43106468	5071	DEL	BRCA1	exon3-intron5	CDS
18_51030621_51046917_DEL_1	18	51030621	51046917	16296	DEL	SMAD4	exon1-intron1	5'UTR
18_51047293_51048683_DEL_1	18	51047293	51048683	1390	DEL	SMAD4	exon2-intron2	CDS
18_51048860_51054779_DEL_1	18	51048860	51054779	5919	DEL	SMAD4	exon3-intron4	CDS
18_51054993_51058124_DEL_1	18	51054993	51058124	3131	DEL	SMAD4	exon5-intron5	CDS
18_51058244_51058339_DEL_1	18	51058244	51058339	95	DEL	SMAD4	exon6-intron6	CDS
18_51065603_51067015_DEL_1	18	51065603	51067015	1412	DEL	SMAD4	exon9-intron9	CDS
18_51067183_51076633_DEL_1	18	51067183	51076633	9450	DEL	SMAD4	exon10-intron10	CDS
18_51076776_51078255_DEL_1	18	51076776	51078255	1479	DEL	SMAD4	exon11-intron11	CDS
19_11089513_11090651_DEL_1	19	11089513	11090651	1138	DEL	LDLR	exon1-intron1	5'UTR-CDS

## Sheet: Supplementary Table 4
Supplementary Table 4. IDs of samples with HiFi long-read sequencing data used for calling SVs for validation
Sample IDs
NA18944
NA18947
NA18949
NA18950
NA18953
NA18956
NA18959
NA18961
NA18965
NA18966
NA18971
NA18972
NA18973
NA18976
NA18977
NA18979
NA18980
NA18981
NA18983
NA18985
NA18987
NA18988
NA18991
NA18992
NA18993
NA18994
NA18997
NA18999
NA19000
NA19001
NA19002
NA19004
NA19005
NA19006
NA19009
NA19010
NA19011
NA19012
NA19062
NA19063
NA19067
NA19068
NA19072
NA19077
NA19078
NA19080
NA19082
NA19083
NA19085
NA19086
NA19090
NA19091
